# Supplementary material
Source: publisher figshare collection journal article supplement (https://gsajournals.figshare.com/ndownloader/files/17300858)
Supplement: Supplementary file 1 [file 17300858]

## Sheet: TubG4
DATA FILTERS
Mir Line	Parameter	Stat	Value
4	% Active	Mean	94.4293
4	% Active	Std Err Mean	0.606365
4	% Active	N	33
4	% Active	p value	0.4886
4	# Active Bouts	Mean	13.7576
4	# Active Bouts	Std Err Mean	1.32861
4	# Active Bouts	N	33
4	# Active Bouts	p value	0.0759
4	Avg. Speed	Mean	1.2595
4	Avg. Speed	Std Err Mean	0.0336099
4	Avg. Speed	N	33
4	Avg. Speed	p value	1
4	Avg. Accel	Mean	3.36358
4	Avg. Accel	Std Err Mean	0.261881
4	Avg. Accel	N	33
4	Avg. Accel	p value	0.0114
4	Distance	Mean	3588.31
4	Distance	Std Err Mean	107.97
4	Distance	N	33
4	Distance	p value	0.998
7	% Active	Mean	76.2808
7	% Active	Std Err Mean	3.50632
7	% Active	N	33
7	% Active	p value	0.9952
7	# Active Bouts	Mean	38.3333
7	# Active Bouts	Std Err Mean	4.36274
7	# Active Bouts	N	33
7	# Active Bouts	p value	0.3444
7	Avg. Speed	Mean	0.902586
7	Avg. Speed	Std Err Mean	0.0545438
7	Avg. Speed	N	33
7	Avg. Speed	p value	0.0005
7	Avg. Accel	Mean	1.46723
7	Avg. Accel	Std Err Mean	0.177355
7	Avg. Accel	N	33
7	Avg. Accel	p value	0.0002
7	Distance	Mean	2265.95
7	Distance	Std Err Mean	193.617
7	Distance	N	33
7	Distance	p value	0.0052
11	% Active	Mean	90.4602
11	% Active	Std Err Mean	1.74856
11	% Active	N	36
11	% Active	p value	1
11	# Active Bouts	Mean	22.4722
11	# Active Bouts	Std Err Mean	2.78103
11	# Active Bouts	N	36
11	# Active Bouts	p value	1
11	Avg. Speed	Mean	1.18219
11	Avg. Speed	Std Err Mean	0.0469004
11	Avg. Speed	N	36
11	Avg. Speed	p value	1
11	Avg. Accel	Mean	3.92596
11	Avg. Accel	Std Err Mean	0.319244
11	Avg. Accel	N	36
11	Avg. Accel	p value	0.0019
11	Distance	Mean	3268.93
11	Distance	Std Err Mean	157.418
11	Distance	N	36
11	Distance	p value	1
190	% Active	Mean	73.3896
190	% Active	Std Err Mean	3.22562
190	% Active	N	32
190	% Active	p value	0.017
190	# Active Bouts	Mean	48.4688
190	# Active Bouts	Std Err Mean	3.47862
190	# Active Bouts	N	32
190	# Active Bouts	p value	<0.0001
190	Avg. Speed	Mean	0.606286
190	Avg. Speed	Std Err Mean	0.0346646
190	Avg. Speed	N	32
190	Avg. Speed	p value	<0.0001
190	Avg. Accel	Mean	0.863126
190	Avg. Accel	Std Err Mean	0.168024
190	Avg. Accel	N	32
190	Avg. Accel	p value	<0.0001
190	Distance	Mean	1466.51
190	Distance	Std Err Mean	113.232
190	Distance	N	32
190	Distance	p value	<0.0001
210	% Active	Mean	88.2806
210	% Active	Std Err Mean	2.22238
210	% Active	N	36
210	% Active	p value	1
210	# Active Bouts	Mean	25.2778
210	# Active Bouts	Std Err Mean	2.73386
210	# Active Bouts	N	36
210	# Active Bouts	p value	1
210	Avg. Speed	Mean	1.1718
210	Avg. Speed	Std Err Mean	0.0469264
210	Avg. Speed	N	36
210	Avg. Speed	p value	1
210	Avg. Accel	Mean	2.22981
210	Avg. Accel	Std Err Mean	0.161971
210	Avg. Accel	N	36
210	Avg. Accel	p value	0.9865
210	Distance	Mean	1841.64
210	Distance	Std Err Mean	141.8
210	Distance	N	36
210	Distance	p value	<0.0001
274	% Active	Mean	86.1952
274	% Active	Std Err Mean	2.07365
274	% Active	N	35
274	% Active	p value	1
274	# Active Bouts	Mean	28.5143
274	# Active Bouts	Std Err Mean	2.98663
274	# Active Bouts	N	35
274	# Active Bouts	p value	1
274	Avg. Speed	Mean	1.02267
274	Avg. Speed	Std Err Mean	0.0438585
274	Avg. Speed	N	35
274	Avg. Speed	p value	0.9477
274	Avg. Accel	Mean	1.67901
274	Avg. Accel	Std Err Mean	0.151034
274	Avg. Accel	N	35
274	Avg. Accel	p value	0.0055
274	Distance	Mean	3473.75
274	Distance	Std Err Mean	131.759
274	Distance	N	35
274	Distance	p value	1
275	% Active	Mean	80.4501
275	% Active	Std Err Mean	2.71194
275	% Active	N	34
275	% Active	p value	1
275	# Active Bouts	Mean	31.0588
275	# Active Bouts	Std Err Mean	2.76144
275	# Active Bouts	N	34
275	# Active Bouts	p value	1
275	Avg. Speed	Mean	0.959612
275	Avg. Speed	Std Err Mean	0.0507011
275	Avg. Speed	N	34
275	Avg. Speed	p value	0.0003
275	Avg. Accel	Mean	2.08426
275	Avg. Accel	Std Err Mean	0.264636
275	Avg. Accel	N	34
275	Avg. Accel	p value	0.7813
275	Distance	Mean	2716.42
275	Distance	Std Err Mean	155.902
275	Distance	N	34
275	Distance	p value	1
276*	% Active	Mean	88.5092
276*	% Active	Std Err Mean	1.4301
276*	% Active	N	36
276*	% Active	p value	1
276*	# Active Bouts	Mean	21.4722
276*	# Active Bouts	Std Err Mean	2.12972
276*	# Active Bouts	N	36
276*	# Active Bouts	p value	1
276*	Avg. Speed	Mean	1.2026
276*	Avg. Speed	Std Err Mean	0.0509235
276*	Avg. Speed	N	36
276*	Avg. Speed	p value	1
276*	Avg. Accel	Mean	2.15821
276*	Avg. Accel	Std Err Mean	0.182985
276*	Avg. Accel	N	36
276*	Avg. Accel	p value	0.9076
276*	Distance	Mean	2294.25
276*	Distance	Std Err Mean	171.83
276*	Distance	N	36
276*	Distance	p value	0.0043
283	% Active	Mean	84.8562
283	% Active	Std Err Mean	2.86243
283	% Active	N	35
283	% Active	p value	1
283	# Active Bouts	Mean	26.2
283	# Active Bouts	Std Err Mean	2.46924
283	# Active Bouts	N	35
283	# Active Bouts	p value	1
283	Avg. Speed	Mean	0.984609
283	Avg. Speed	Std Err Mean	0.0414223
283	Avg. Speed	N	35
283	Avg. Speed	p value	0.3125
283	Avg. Accel	Mean	1.50944
283	Avg. Accel	Std Err Mean	0.148913
283	Avg. Accel	N	35
283	Avg. Accel	p value	0.0002
283	Distance	Mean	2987.24
283	Distance	Std Err Mean	140.759
283	Distance	N	35
283	Distance	p value	1
285	% Active	Mean	90.4762
285	% Active	Std Err Mean	1.84479
285	% Active	N	35
285	% Active	p value	1
285	# Active Bouts	Mean	20.8
285	# Active Bouts	Std Err Mean	2.0129
285	# Active Bouts	N	35
285	# Active Bouts	p value	1
285	Avg. Speed	Mean	1.17152
285	Avg. Speed	Std Err Mean	0.0390707
285	Avg. Speed	N	35
285	Avg. Speed	p value	1
285	Avg. Accel	Mean	3.2923
285	Avg. Accel	Std Err Mean	0.276891
285	Avg. Accel	N	35
285	Avg. Accel	p value	0.0426
285	Distance	Mean	1835.64
285	Distance	Std Err Mean	205.905
285	Distance	N	35
285	Distance	p value	<0.0001
286	% Active	Mean	76.7657
286	% Active	Std Err Mean	2.81658
286	% Active	N	36
286	% Active	p value	1
286	# Active Bouts	Mean	36.7778
286	# Active Bouts	Std Err Mean	3.02348
286	# Active Bouts	N	36
286	# Active Bouts	p value	0.7019
286	Avg. Speed	Mean	0.914843
286	Avg. Speed	Std Err Mean	0.0470102
286	Avg. Speed	N	36
286	Avg. Speed	p value	0.0006
286	Avg. Accel	Mean	1.41056
286	Avg. Accel	Std Err Mean	0.154865
286	Avg. Accel	N	36
286	Avg. Accel	p value	<0.0001
286	Distance	Mean	3153.15
286	Distance	Std Err Mean	155.195
286	Distance	N	36
286	Distance	p value	1
287	% Active	Mean	87.4937
287	% Active	Std Err Mean	1.96295
287	% Active	N	53
287	% Active	p value	1
287	# Active Bouts	Mean	24.434
287	# Active Bouts	Std Err Mean	2.7359
287	# Active Bouts	N	53
287	# Active Bouts	p value	1
287	Avg. Speed	Mean	1.27511
287	Avg. Speed	Std Err Mean	0.044393
287	Avg. Speed	N	53
287	Avg. Speed	p value	0.8099
287	Avg. Accel	Mean	4.55658
287	Avg. Accel	Std Err Mean	0.304316
287	Avg. Accel	N	53
287	Avg. Accel	p value	<0.0001
287	Distance	Mean	2761.49
287	Distance	Std Err Mean	169.12
287	Distance	N	53
287	Distance	p value	0.9996
289	% Active	Mean	88.1153
289	% Active	Std Err Mean	2.6513
289	% Active	N	35
289	% Active	p value	1
289	# Active Bouts	Mean	22.6
289	# Active Bouts	Std Err Mean	2.20053
289	# Active Bouts	N	35
289	# Active Bouts	p value	1
289	Avg. Speed	Mean	1.14412
289	Avg. Speed	Std Err Mean	0.0393883
289	Avg. Speed	N	35
289	Avg. Speed	p value	1
289	Avg. Accel	Mean	3.68135
289	Avg. Accel	Std Err Mean	0.286935
289	Avg. Accel	N	35
289	Avg. Accel	p value	0.0026
289	Distance	Mean	3597.75
289	Distance	Std Err Mean	143.087
289	Distance	N	35
289	Distance	p value	0.9916
305	% Active	Mean	70.9041
305	% Active	Std Err Mean	2.88236
305	% Active	N	33
305	% Active	p value	<0.0001
305	# Active Bouts	Mean	47.3333
305	# Active Bouts	Std Err Mean	2.68154
305	# Active Bouts	N	33
305	# Active Bouts	p value	<0.0001
305	Avg. Speed	Mean	0.827483
305	Avg. Speed	Std Err Mean	0.0399053
305	Avg. Speed	N	33
305	Avg. Speed	p value	<0.0001
305	Avg. Accel	Mean	1.19285
305	Avg. Accel	Std Err Mean	0.127974
305	Avg. Accel	N	33
305	Avg. Accel	p value	<0.0001
305	Distance	Mean	1886.39
305	Distance	Std Err Mean	128.992
305	Distance	N	33
305	Distance	p value	<0.0001
310	% Active	Mean	73.4314
310	% Active	Std Err Mean	3.27214
310	% Active	N	35
310	% Active	p value	0.0072
310	# Active Bouts	Mean	41
310	# Active Bouts	Std Err Mean	2.6295
310	# Active Bouts	N	35
310	# Active Bouts	p value	0.0083
310	Avg. Speed	Mean	0.898465
310	Avg. Speed	Std Err Mean	0.034011
310	Avg. Speed	N	35
310	Avg. Speed	p value	0.0001
310	Avg. Accel	Mean	2.12405
310	Avg. Accel	Std Err Mean	0.173697
310	Avg. Accel	N	35
310	Avg. Accel	p value	0.8577
310	Distance	Mean	2081.38
310	Distance	Std Err Mean	122.429
310	Distance	N	35
310	Distance	p value	<0.0001
312	% Active	Mean	70.1629
312	% Active	Std Err Mean	3.01879
312	% Active	N	35
312	% Active	p value	<0.0001
312	# Active Bouts	Mean	51.0857
312	# Active Bouts	Std Err Mean	3.80918
312	# Active Bouts	N	35
312	# Active Bouts	p value	<0.0001
312	Avg. Speed	Mean	0.830656
312	Avg. Speed	Std Err Mean	0.0508999
312	Avg. Speed	N	35
312	Avg. Speed	p value	<0.0001
312	Avg. Accel	Mean	1.29417
312	Avg. Accel	Std Err Mean	0.16375
312	Avg. Accel	N	35
312	Avg. Accel	p value	<0.0001
312	Distance	Mean	1927.72
312	Distance	Std Err Mean	161.751
312	Distance	N	35
312	Distance	p value	<0.0001
313	% Active	Mean	83.7934
313	% Active	Std Err Mean	2.8347
313	% Active	N	35
313	% Active	p value	1
313	# Active Bouts	Mean	28.1429
313	# Active Bouts	Std Err Mean	3.40048
313	# Active Bouts	N	35
313	# Active Bouts	p value	1
313	Avg. Speed	Mean	1.21194
313	Avg. Speed	Std Err Mean	0.0462695
313	Avg. Speed	N	35
313	Avg. Speed	p value	1
313	Avg. Accel	Mean	3.96075
313	Avg. Accel	Std Err Mean	0.367899
313	Avg. Accel	N	35
313	Avg. Accel	p value	0.0137
313	Distance	Mean	3170.63
313	Distance	Std Err Mean	186.192
313	Distance	N	35
313	Distance	p value	1
929	% Active	Mean	79.75
929	% Active	Std Err Mean	1.69905
929	% Active	N	36
929	% Active	p value	1
929	# Active Bouts	Mean	40.1944
929	# Active Bouts	Std Err Mean	2.4601
929	# Active Bouts	N	36
929	# Active Bouts	p value	0.0214
929	Avg. Speed	Mean	0.880969
929	Avg. Speed	Std Err Mean	0.0402948
929	Avg. Speed	N	36
929	Avg. Speed	p value	<0.0001
929	Avg. Accel	Mean	1.20372
929	Avg. Accel	Std Err Mean	0.118238
929	Avg. Accel	N	36
929	Avg. Accel	p value	<0.0001
929	Distance	Mean	2169.06
929	Distance	Std Err Mean	117.661
929	Distance	N	36
929	Distance	p value	<0.0001
963	% Active	Mean	69.6727
963	% Active	Std Err Mean	3.60385
963	% Active	N	33
963	% Active	p value	1
963	# Active Bouts	Mean	40.8485
963	# Active Bouts	Std Err Mean	3.92619
963	# Active Bouts	N	33
963	# Active Bouts	p value	0.0191
963	Avg. Speed	Mean	0.864808
963	Avg. Speed	Std Err Mean	0.042782
963	Avg. Speed	N	33
963	Avg. Speed	p value	<0.0001
963	Avg. Accel	Mean	1.13633
963	Avg. Accel	Std Err Mean	0.13192
963	Avg. Accel	N	33
963	Avg. Accel	p value	<0.0001
963	Distance	Mean	1962.24
963	Distance	Std Err Mean	166.43
963	Distance	N	33
963	Distance	p value	<0.0001
966	% Active	Mean	89.6958
966	% Active	Std Err Mean	1.82134
966	% Active	N	32
966	% Active	p value	1
966	# Active Bouts	Mean	21.875
966	# Active Bouts	Std Err Mean	2.61268
966	# Active Bouts	N	32
966	# Active Bouts	p value	1
966	Avg. Speed	Mean	1.40754
966	Avg. Speed	Std Err Mean	0.0397066
966	Avg. Speed	N	32
966	Avg. Speed	p value	0.0185
966	Avg. Accel	Mean	3.5062
966	Avg. Accel	Std Err Mean	0.200628
966	Avg. Accel	N	32
966	Avg. Accel	p value	0.0199
966	Distance	Mean	3841.83
966	Distance	Std Err Mean	140.192
966	Distance	N	32
966	Distance	p value	<0.0001
977	% Active	Mean	75.4473
977	% Active	Std Err Mean	4.36523
977	% Active	N	31
977	% Active	p value	0.3534
977	# Active Bouts	Mean	36.3226
977	# Active Bouts	Std Err Mean	3.56397
977	# Active Bouts	N	31
977	# Active Bouts	p value	0.9517
977	Avg. Speed	Mean	0.936311
977	Avg. Speed	Std Err Mean	0.0543207
977	Avg. Speed	N	31
977	Avg. Speed	p value	0.026
977	Avg. Accel	Mean	1.62238
977	Avg. Accel	Std Err Mean	0.19227
977	Avg. Accel	N	31
977	Avg. Accel	p value	0.008
977	Distance	Mean	2310.45
977	Distance	Std Err Mean	200.961
977	Distance	N	31
977	Distance	p value	0.0305
979	% Active	Mean	84.2692
979	% Active	Std Err Mean	2.30636
979	% Active	N	53
979	% Active	p value	1
979	# Active Bouts	Mean	27.4528
979	# Active Bouts	Std Err Mean	2.22542
979	# Active Bouts	N	53
979	# Active Bouts	p value	1
979	Avg. Speed	Mean	1.10898
979	Avg. Speed	Std Err Mean	0.041667
979	Avg. Speed	N	53
979	Avg. Speed	p value	1
979	Avg. Accel	Mean	3.24906
979	Avg. Accel	Std Err Mean	0.27987
979	Avg. Accel	N	53
979	Avg. Accel	p value	0.0006
979	Distance	Mean	2905.14
979	Distance	Std Err Mean	145.54
979	Distance	N	53
979	Distance	p value	1
994	% Active	Mean	85.1352
994	% Active	Std Err Mean	2.13699
994	% Active	N	36
994	% Active	p value	1
994	# Active Bouts	Mean	28.6389
994	# Active Bouts	Std Err Mean	3.26311
994	# Active Bouts	N	36
994	# Active Bouts	p value	1
994	Avg. Speed	Mean	1.01565
994	Avg. Speed	Std Err Mean	0.0541761
994	Avg. Speed	N	36
994	Avg. Speed	p value	0.8527
994	Avg. Accel	Mean	1.6123
994	Avg. Accel	Std Err Mean	0.18587
994	Avg. Accel	N	36
994	Avg. Accel	p value	0.0011
994	Distance	Mean	2684.45
994	Distance	Std Err Mean	179.995
994	Distance	N	36
994	Distance	p value	0.9993
996	% Active	Mean	92.1952
996	% Active	Std Err Mean	1.23913
996	% Active	N	35
996	% Active	p value	0.9912
996	# Active Bouts	Mean	17.4286
996	# Active Bouts	Std Err Mean	1.85811
996	# Active Bouts	N	35
996	# Active Bouts	p value	0.9007
996	Avg. Speed	Mean	1.22462
996	Avg. Speed	Std Err Mean	0.0377017
996	Avg. Speed	N	35
996	Avg. Speed	p value	1
996	Avg. Accel	Mean	3.50072
996	Avg. Accel	Std Err Mean	0.26537
996	Avg. Accel	N	35
996	Avg. Accel	p value	0.0322
996	Distance	Mean	3423.11
996	Distance	Std Err Mean	129.876
996	Distance	N	35
996	Distance	p value	1
997	% Active	Mean	96.5293
997	% Active	Std Err Mean	1.19602
997	% Active	N	25
997	% Active	p value	0.2526
997	# Active Bouts	Mean	9.88
997	# Active Bouts	Std Err Mean	2.29806
997	# Active Bouts	N	25
997	# Active Bouts	p value	0.0066
997	Avg. Speed	Mean	1.42885
997	Avg. Speed	Std Err Mean	0.0529233
997	Avg. Speed	N	25
997	Avg. Speed	p value	0.0349
997	Avg. Accel	Mean	4.37363
997	Avg. Accel	Std Err Mean	0.442544
997	Avg. Accel	N	25
997	Avg. Accel	p value	0.0506
997	Distance	Mean	4169.14
997	Distance	Std Err Mean	176.173
997	Distance	N	25
997	Distance	p value	0.0008
1003	% Active	Mean	96.3176
1003	% Active	Std Err Mean	0.578135
1003	% Active	N	34
1003	% Active	p value	0.0386
1003	# Active Bouts	Mean	8.58824
1003	# Active Bouts	Std Err Mean	0.936598
1003	# Active Bouts	N	34
1003	# Active Bouts	p value	<0.0001
1003	Avg. Speed	Mean	1.42626
1003	Avg. Speed	Std Err Mean	0.028253
1003	Avg. Speed	N	34
1003	Avg. Speed	p value	0.0016
1003	Avg. Accel	Mean	2.96274
1003	Avg. Accel	Std Err Mean	0.105939
1003	Avg. Accel	N	34
1003	Avg. Accel	p value	1
1003	Distance	Mean	4134.61
1003	Distance	Std Err Mean	93.7924
1003	Distance	N	34
1003	Distance	p value	<0.0001
263a	% Active	Mean	59.2562
263a	% Active	Std Err Mean	3.39977
263a	% Active	N	35
263a	% Active	p value	<0.0001
263a	# Active Bouts	Mean	53.5714
263a	# Active Bouts	Std Err Mean	3.30883
263a	# Active Bouts	N	35
263a	# Active Bouts	p value	<0.0001
263a	Avg. Speed	Mean	0.727635
263a	Avg. Speed	Std Err Mean	0.0453883
263a	Avg. Speed	N	35
263a	Avg. Speed	p value	<0.0001
263a	Avg. Accel	Mean	0.832716
263a	Avg. Accel	Std Err Mean	0.121833
263a	Avg. Accel	N	35
263a	Avg. Accel	p value	<0.0001
263a	Distance	Mean	2902.47
263a	Distance	Std Err Mean	148.347
263a	Distance	N	35
263a	Distance	p value	1
263b	% Active	Mean	92.6085
263b	% Active	Std Err Mean	0.960122
263b	% Active	N	31
263b	% Active	p value	0.9913
263b	# Active Bouts	Mean	15.6452
263b	# Active Bouts	Std Err Mean	1.72617
263b	# Active Bouts	N	31
263b	# Active Bouts	p value	0.5779
263b	Avg. Speed	Mean	1.25525
263b	Avg. Speed	Std Err Mean	0.0494757
263b	Avg. Speed	N	31
263b	Avg. Speed	p value	1
263b	Avg. Accel	Mean	2.32524
263b	Avg. Accel	Std Err Mean	0.177334
263b	Avg. Accel	N	31
263b	Avg. Accel	p value	1
263b	Distance	Mean	1329.06
263b	Distance	Std Err Mean	159.403
263b	Distance	N	31
263b	Distance	p value	<0.0001
276a	% Active	Mean	49.7634
276a	% Active	Std Err Mean	3.15245
276a	% Active	N	20
276a	% Active	p value	<0.0001
276a	# Active Bouts	Mean	64
276a	# Active Bouts	Std Err Mean	4.27477
276a	# Active Bouts	N	20
276a	# Active Bouts	p value	<0.0001
276a	Avg. Speed	Mean	0.468383
276a	Avg. Speed	Std Err Mean	0.029223
276a	Avg. Speed	N	20
276a	Avg. Speed	p value	<0.0001
276a	Avg. Accel	Mean	0.213176
276a	Avg. Accel	Std Err Mean	0.0580312
276a	Avg. Accel	N	20
276a	Avg. Accel	p value	<0.0001
276a	Distance	Mean	3200.81
276a	Distance	Std Err Mean	189.398
276a	Distance	N	20
276a	Distance	p value	1
276b	% Active	Mean	88.462
276b	% Active	Std Err Mean	2.42012
276b	% Active	N	36
276b	% Active	p value	1
276b	# Active Bouts	Mean	21.6111
276b	# Active Bouts	Std Err Mean	3.20151
276b	# Active Bouts	N	36
276b	# Active Bouts	p value	1
276b	Avg. Speed	Mean	1.20086
276b	Avg. Speed	Std Err Mean	0.0507184
276b	Avg. Speed	N	36
276b	Avg. Speed	p value	1
276b	Avg. Accel	Mean	4.29446
276b	Avg. Accel	Std Err Mean	0.346339
276b	Avg. Accel	N	36
276b	Avg. Accel	p value	0.0046
276b	Distance	Mean	611.27
276b	Distance	Std Err Mean	66.2431
276b	Distance	N	36
276b	Distance	p value	<0.0001
2a	% Active	Mean	78.5626
2a	% Active	Std Err Mean	2.66463
2a	% Active	N	33
2a	% Active	p value	0.9986
2a	# Active Bouts	Mean	41.4545
2a	# Active Bouts	Std Err Mean	3.05167
2a	# Active Bouts	N	33
2a	# Active Bouts	p value	0.0078
2a	Avg. Speed	Mean	0.781016
2a	Avg. Speed	Std Err Mean	0.0413406
2a	Avg. Speed	N	33
2a	Avg. Speed	p value	<0.0001
2a	Avg. Accel	Mean	0.884607
2a	Avg. Accel	Std Err Mean	0.119071
2a	Avg. Accel	N	33
2a	Avg. Accel	p value	<0.0001
2a	Distance	Mean	2997.6
2a	Distance	Std Err Mean	177.146
2a	Distance	N	33
2a	Distance	p value	1
2c	% Active	Mean	92.849
2c	% Active	Std Err Mean	0.90483
2c	% Active	N	34
2c	% Active	p value	0.9469
2c	# Active Bouts	Mean	20.4412
2c	# Active Bouts	Std Err Mean	2.03498
2c	# Active Bouts	N	34
2c	# Active Bouts	p value	1
2c	Avg. Speed	Mean	1.0016
2c	Avg. Speed	Std Err Mean	0.0410649
2c	Avg. Speed	N	34
2c	Avg. Speed	p value	0.69
2c	Avg. Accel	Mean	1.39283
2c	Avg. Accel	Std Err Mean	0.138233
2c	Avg. Accel	N	34
2c	Avg. Accel	p value	<0.0001
2c	Distance	Mean	2814.69
2c	Distance	Std Err Mean	124.979
2c	Distance	N	34
2c	Distance	p value	1
92b	% Active	Mean	77.2913
92b	% Active	Std Err Mean	2.44951
92b	% Active	N	50
92b	% Active	p value	0.2893
92b	# Active Bouts	Mean	36.88
92b	# Active Bouts	Std Err Mean	2.74221
92b	# Active Bouts	N	50
92b	# Active Bouts	p value	0.1696
92b	Avg. Speed	Mean	0.889033
92b	Avg. Speed	Std Err Mean	0.0392771
92b	Avg. Speed	N	50
92b	Avg. Speed	p value	<0.0001
92b	Avg. Accel	Mean	1.70639
92b	Avg. Accel	Std Err Mean	0.233771
92b	Avg. Accel	N	50
92b	Avg. Accel	p value	<0.0001
92b	Distance	Mean	2179.34
92b	Distance	Std Err Mean	132.994
92b	Distance	N	50
92b	Distance	p value	<0.0001
9a	% Active	Mean	84.7426
9a	% Active	Std Err Mean	2.45628
9a	% Active	N	36
9a	% Active	p value	1
9a	# Active Bouts	Mean	31.5833
9a	# Active Bouts	Std Err Mean	3.19707
9a	# Active Bouts	N	36
9a	# Active Bouts	p value	1
9a	Avg. Speed	Mean	0.886576
9a	Avg. Speed	Std Err Mean	0.0507956
9a	Avg. Speed	N	36
9a	Avg. Speed	p value	<0.0001
9a	Avg. Accel	Mean	1.26217
9a	Avg. Accel	Std Err Mean	0.156723
9a	Avg. Accel	N	36
9a	Avg. Accel	p value	<0.0001
9a	Distance	Mean	2341.06
9a	Distance	Std Err Mean	163.605
9a	Distance	N	36
9a	Distance	p value	0.0158
9b	% Active	Mean	48.1183
9b	% Active	Std Err Mean	3.34674
9b	% Active	N	20
9b	% Active	p value	<0.0001
9b	# Active Bouts	Mean	74
9b	# Active Bouts	Std Err Mean	3.9822
9b	# Active Bouts	N	20
9b	# Active Bouts	p value	<0.0001
9b	Avg. Speed	Mean	0.433552
9b	Avg. Speed	Std Err Mean	0.0283079
9b	Avg. Speed	N	20
9b	Avg. Speed	p value	<0.0001
9b	Avg. Accel	Mean	0.149768
9b	Avg. Accel	Std Err Mean	0.0434564
9b	Avg. Accel	N	20
9b	Avg. Accel	p value	<0.0001
9b	Distance	Mean	711.128
9b	Distance	Std Err Mean	47.8301
9b	Distance	N	20
9b	Distance	p value	<0.0001
9c	% Active	Mean	76.2764
9c	% Active	Std Err Mean	3.57039
9c	% Active	N	31
9c	% Active	p value	0.6629
9c	# Active Bouts	Mean	39.0968
9c	# Active Bouts	Std Err Mean	3.38318
9c	# Active Bouts	N	31
9c	# Active Bouts	p value	0.2428
9c	Avg. Speed	Mean	0.780356
9c	Avg. Speed	Std Err Mean	0.0505348
9c	Avg. Speed	N	31
9c	Avg. Speed	p value	<0.0001
9c	Avg. Accel	Mean	1.48774
9c	Avg. Accel	Std Err Mean	0.276177
9c	Avg. Accel	N	31
9c	Avg. Accel	p value	0.0007
9c	Distance	Mean	1930.97
9c	Distance	Std Err Mean	170.692
9c	Distance	N	31
9c	Distance	p value	<0.0001
Let7	% Active	Mean	91.7666
Let7	% Active	Std Err Mean	1.44363
Let7	% Active	N	35
Let7	% Active	p value	0.9987
Let7	# Active Bouts	Mean	19.8571
Let7	# Active Bouts	Std Err Mean	2.36826
Let7	# Active Bouts	N	35
Let7	# Active Bouts	p value	1
Let7	Avg. Speed	Mean	1.17045
Let7	Avg. Speed	Std Err Mean	0.0502944
Let7	Avg. Speed	N	35
Let7	Avg. Speed	p value	1
Let7	Avg. Accel	Mean	3.21552
Let7	Avg. Accel	Std Err Mean	0.314375
Let7	Avg. Accel	N	35
Let7	Avg. Accel	p value	0.0153
Let7	Distance	Mean	3274.42
Let7	Distance	Std Err Mean	165.243
Let7	Distance	N	35
Let7	Distance	p value	1
Scramble	% Active	Mean	85.266
Scramble	% Active	Std Err Mean	0.52116
Scramble	% Active	N	855
Scramble	% Active	p value	N/A
Scramble	# Active Bouts	Mean	26.7825
Scramble	# Active Bouts	Std Err Mean	0.630792
Scramble	# Active Bouts	N	855
Scramble	# Active Bouts	p value	N/A
Scramble	Avg. Speed	Mean	1.17169
Scramble	Avg. Speed	Std Err Mean	0.0109131
Scramble	Avg. Speed	N	855
Scramble	Avg. Speed	p value	N/A
Scramble	Avg. Accel	Mean	2.99064
Scramble	Avg. Accel	Std Err Mean	0.0694225
Scramble	Avg. Accel	N	855
Scramble	Avg. Accel	p value	N/A
Scramble	Distance	Mean	3119.56
Scramble	Distance	Std Err Mean	37.7943
Scramble	Distance	N	855
Scramble	Distance	p value	N/A

## Sheet: C155
DATA FILTERS
Mir Line	Parameter	Stat	Value
1	% Active	Mean	88.7155
1	% Active	Std Err Mean	2.73307
1	% Active	N	31
1	% Active	p value	0.6275
1	# Active Bouts	Mean	21.1613
1	# Active Bouts	Std Err Mean	3.09321
1	# Active Bouts	N	31
1	# Active Bouts	p value	<0.0001
1	Avg. Active Bout Length	Mean	24.8138
1	Avg. Active Bout Length	Std Err Mean	3.68893
1	Avg. Active Bout Length	N	31
1	Avg. Active Bout Length	p value	1
1	Avg. Speed	Mean	1.60489
1	Avg. Speed	Std Err Mean	0.0757532
1	Avg. Speed	N	31
1	Avg. Speed	p value	0.0014
1	Avg. Accel	Mean	3.56607
1	Avg. Accel	Std Err Mean	0.269273
1	Avg. Accel	N	31
1	Avg. Accel	p value	0.0002
1	Distance	Mean	4414.5
1	Distance	Std Err Mean	266.17
1	Distance	N	31
1	Distance	p value	0.5321
4	% Active	Mean	93.4756
4	% Active	Std Err Mean	1.09528
4	% Active	N	30
4	% Active	p value	1
4	# Active Bouts	Mean	18.2
4	# Active Bouts	Std Err Mean	2.47256
4	# Active Bouts	N	30
4	# Active Bouts	p value	<0.0001
4	Avg. Active Bout Length	Mean	25.6002
4	Avg. Active Bout Length	Std Err Mean	3.20129
4	Avg. Active Bout Length	N	30
4	Avg. Active Bout Length	p value	1
4	Avg. Speed	Mean	1.6076
4	Avg. Speed	Std Err Mean	0.0741154
4	Avg. Speed	N	30
4	Avg. Speed	p value	0.0023
4	Avg. Accel	Mean	3.69741
4	Avg. Accel	Std Err Mean	0.262517
4	Avg. Accel	N	30
4	Avg. Accel	p value	0.003
4	Distance	Mean	4552.44
4	Distance	Std Err Mean	236.127
4	Distance	N	30
4	Distance	p value	0.9585
7	% Active	Mean	84.5637
7	% Active	Std Err Mean	2.50956
7	% Active	N	31
7	% Active	p value	0.0002
7	# Active Bouts	Mean	29.6452
7	# Active Bouts	Std Err Mean	2.86452
7	# Active Bouts	N	31
7	# Active Bouts	p value	<0.0001
7	Avg. Active Bout Length	Mean	12.4161
7	Avg. Active Bout Length	Std Err Mean	1.53253
7	Avg. Active Bout Length	N	31
7	Avg. Active Bout Length	p value	0.1863
7	Avg. Speed	Mean	1.55445
7	Avg. Speed	Std Err Mean	0.0639314
7	Avg. Speed	N	31
7	Avg. Speed	p value	<0.0001
7	Avg. Accel	Mean	3.38296
7	Avg. Accel	Std Err Mean	0.226636
7	Avg. Accel	N	31
7	Avg. Accel	p value	<0.0001
7	Distance	Mean	4068.43
7	Distance	Std Err Mean	241.65
7	Distance	N	31
7	Distance	p value	0.0028
276*	% Active	Mean	85.9426
276*	% Active	Std Err Mean	2.77668
276*	% Active	N	31
276*	% Active	p value	0.007
276*	# Active Bouts	Mean	19.6129
276*	# Active Bouts	Std Err Mean	2.36674
276*	# Active Bouts	N	31
276*	# Active Bouts	p value	<0.0001
276*	Avg. Active Bout Length	Mean	20.243
276*	Avg. Active Bout Length	Std Err Mean	2.41001
276*	Avg. Active Bout Length	N	31
276*	Avg. Active Bout Length	p value	1
276*	Avg. Speed	Mean	1.46147
276*	Avg. Speed	Std Err Mean	0.0602848
276*	Avg. Speed	N	31
276*	Avg. Speed	p value	<0.0001
276*	Avg. Accel	Mean	3.10377
276*	Avg. Accel	Std Err Mean	0.214656
276*	Avg. Accel	N	31
276*	Avg. Accel	p value	<0.0001
276*	Distance	Mean	3861.08
276*	Distance	Std Err Mean	219.713
276*	Distance	N	31
276*	Distance	p value	<0.0001
282	% Active	Mean	93.2655
282	% Active	Std Err Mean	1.3939
282	% Active	N	31
282	% Active	p value	1
282	# Active Bouts	Mean	13.9355
282	# Active Bouts	Std Err Mean	1.84562
282	# Active Bouts	N	31
282	# Active Bouts	p value	0.0833
282	Avg. Active Bout Length	Mean	33.4984
282	Avg. Active Bout Length	Std Err Mean	4.1349
282	Avg. Active Bout Length	N	31
282	Avg. Active Bout Length	p value	0.0279
282	Avg. Speed	Mean	1.58596
282	Avg. Speed	Std Err Mean	0.0567893
282	Avg. Speed	N	31
282	Avg. Speed	p value	0.0003
282	Avg. Accel	Mean	3.75401
282	Avg. Accel	Std Err Mean	0.230383
282	Avg. Accel	N	31
282	Avg. Accel	p value	0.0062
282	Distance	Mean	4457.77
282	Distance	Std Err Mean	179.985
282	Distance	N	31
282	Distance	p value	0.7032
283	% Active	Mean	89.6267
283	% Active	Std Err Mean	1.87168
283	% Active	N	31
283	% Active	p value	0.9394
283	# Active Bouts	Mean	19.871
283	# Active Bouts	Std Err Mean	2.05816
283	# Active Bouts	N	31
283	# Active Bouts	p value	<0.0001
283	Avg. Active Bout Length	Mean	20.0533
283	Avg. Active Bout Length	Std Err Mean	2.7447
283	Avg. Active Bout Length	N	31
283	Avg. Active Bout Length	p value	1
283	Avg. Speed	Mean	1.45673
283	Avg. Speed	Std Err Mean	0.0710244
283	Avg. Speed	N	31
283	Avg. Speed	p value	<0.0001
283	Avg. Accel	Mean	3.21464
283	Avg. Accel	Std Err Mean	0.272282
283	Avg. Accel	N	31
283	Avg. Accel	p value	<0.0001
283	Distance	Mean	3970.24
283	Distance	Std Err Mean	223.467
283	Distance	N	31
283	Distance	p value	0.0003
285	% Active	Mean	87.8895
285	% Active	Std Err Mean	2.43675
285	% Active	N	31
285	% Active	p value	0.2663
285	# Active Bouts	Mean	22.6452
285	# Active Bouts	Std Err Mean	2.6646
285	# Active Bouts	N	31
285	# Active Bouts	p value	<0.0001
285	Avg. Active Bout Length	Mean	17.6701
285	Avg. Active Bout Length	Std Err Mean	2.43653
285	Avg. Active Bout Length	N	31
285	Avg. Active Bout Length	p value	0.9999
285	Avg. Speed	Mean	1.62318
285	Avg. Speed	Std Err Mean	0.0645458
285	Avg. Speed	N	31
285	Avg. Speed	p value	0.005
285	Avg. Accel	Mean	3.6672
285	Avg. Accel	Std Err Mean	0.210861
285	Avg. Accel	N	31
285	Avg. Accel	p value	0.0012
285	Distance	Mean	4391.91
285	Distance	Std Err Mean	225.56
285	Distance	N	31
285	Distance	p value	0.4425
286	% Active	Mean	87.2022
286	% Active	Std Err Mean	2.56806
286	% Active	N	31
286	% Active	p value	0.0926
286	# Active Bouts	Mean	32.0968
286	# Active Bouts	Std Err Mean	2.77018
286	# Active Bouts	N	31
286	# Active Bouts	p value	<0.0001
286	Avg. Active Bout Length	Mean	12.6776
286	Avg. Active Bout Length	Std Err Mean	2.43021
286	Avg. Active Bout Length	N	31
286	Avg. Active Bout Length	p value	0.2364
286	Avg. Speed	Mean	1.57153
286	Avg. Speed	Std Err Mean	0.0654791
286	Avg. Speed	N	31
286	Avg. Speed	p value	0.0001
286	Avg. Accel	Mean	3.66525
286	Avg. Accel	Std Err Mean	0.220296
286	Avg. Accel	N	31
286	Avg. Accel	p value	0.0012
286	Distance	Mean	4246.02
286	Distance	Std Err Mean	222.396
286	Distance	N	31
286	Distance	p value	0.0744
287	% Active	Mean	92.9091
287	% Active	Std Err Mean	1.0412
287	% Active	N	32
287	% Active	p value	1
287	# Active Bouts	Mean	18.5625
287	# Active Bouts	Std Err Mean	2.33139
287	# Active Bouts	N	32
287	# Active Bouts	p value	<0.0001
287	Avg. Active Bout Length	Mean	23.744
287	Avg. Active Bout Length	Std Err Mean	2.96257
287	Avg. Active Bout Length	N	32
287	Avg. Active Bout Length	p value	1
287	Avg. Speed	Mean	1.60374
287	Avg. Speed	Std Err Mean	0.0650892
287	Avg. Speed	N	32
287	Avg. Speed	p value	0.0009
287	Avg. Accel	Mean	3.82933
287	Avg. Accel	Std Err Mean	0.252806
287	Avg. Accel	N	32
287	Avg. Accel	p value	0.0175
287	Distance	Mean	4517.16
287	Distance	Std Err Mean	209.156
287	Distance	N	32
287	Distance	p value	0.8681
289	% Active	Mean	92.0388
289	% Active	Std Err Mean	2.68448
289	% Active	N	29
289	% Active	p value	1
289	# Active Bouts	Mean	15.3793
289	# Active Bouts	Std Err Mean	2.07282
289	# Active Bouts	N	29
289	# Active Bouts	p value	0.0119
289	Avg. Active Bout Length	Mean	26.9714
289	Avg. Active Bout Length	Std Err Mean	3.14033
289	Avg. Active Bout Length	N	29
289	Avg. Active Bout Length	p value	0.9998
289	Avg. Speed	Mean	1.61557
289	Avg. Speed	Std Err Mean	0.0552446
289	Avg. Speed	N	29
289	Avg. Speed	p value	0.0054
289	Avg. Accel	Mean	3.76253
289	Avg. Accel	Std Err Mean	0.214011
289	Avg. Accel	N	29
289	Avg. Accel	p value	0.0124
289	Distance	Mean	4544.82
289	Distance	Std Err Mean	192.818
289	Distance	N	29
289	Distance	p value	0.9585
303	% Active	Mean	90.9869
303	% Active	Std Err Mean	1.83209
303	% Active	N	33
303	% Active	p value	0.9999
303	# Active Bouts	Mean	21.4545
303	# Active Bouts	Std Err Mean	2.97117
303	# Active Bouts	N	33
303	# Active Bouts	p value	<0.0001
303	Avg. Active Bout Length	Mean	22.6379
303	Avg. Active Bout Length	Std Err Mean	3.14686
303	Avg. Active Bout Length	N	33
303	Avg. Active Bout Length	p value	1
303	Avg. Speed	Mean	1.61296
303	Avg. Speed	Std Err Mean	0.0608489
303	Avg. Speed	N	33
303	Avg. Speed	p value	0.0013
303	Avg. Accel	Mean	3.8891
303	Avg. Accel	Std Err Mean	0.279161
303	Avg. Accel	N	33
303	Avg. Accel	p value	0.0368
303	Distance	Mean	4479.19
303	Distance	Std Err Mean	205.491
303	Distance	N	33
303	Distance	p value	0.7222
313	% Active	Mean	90.9768
313	% Active	Std Err Mean	1.15505
313	% Active	N	33
313	% Active	p value	0.9999
313	# Active Bouts	Mean	22.1818
313	# Active Bouts	Std Err Mean	1.64078
313	# Active Bouts	N	33
313	# Active Bouts	p value	<0.0001
313	Avg. Active Bout Length	Mean	16.2182
313	Avg. Active Bout Length	Std Err Mean	1.90887
313	Avg. Active Bout Length	N	33
313	Avg. Active Bout Length	p value	0.9784
313	Avg. Speed	Mean	1.64904
313	Avg. Speed	Std Err Mean	0.0512445
313	Avg. Speed	N	33
313	Avg. Speed	p value	0.0161
313	Avg. Accel	Mean	3.84249
313	Avg. Accel	Std Err Mean	0.186979
313	Avg. Accel	N	33
313	Avg. Accel	p value	0.0173
313	Distance	Mean	4529.01
313	Distance	Std Err Mean	161.203
313	Distance	N	33
313	Distance	p value	0.8795
929	% Active	Mean	90.2088
929	% Active	Std Err Mean	1.74835
929	% Active	N	33
929	% Active	p value	0.9888
929	# Active Bouts	Mean	19.9697
929	# Active Bouts	Std Err Mean	2.56893
929	# Active Bouts	N	33
929	# Active Bouts	p value	<0.0001
929	Avg. Active Bout Length	Mean	21.6513
929	Avg. Active Bout Length	Std Err Mean	2.56869
929	Avg. Active Bout Length	N	33
929	Avg. Active Bout Length	p value	1
929	Avg. Speed	Mean	1.62853
929	Avg. Speed	Std Err Mean	0.0656081
929	Avg. Speed	N	33
929	Avg. Speed	p value	0.0041
929	Avg. Accel	Mean	3.95367
929	Avg. Accel	Std Err Mean	0.290052
929	Avg. Accel	N	33
929	Avg. Accel	p value	0.0936
929	Distance	Mean	4494.42
929	Distance	Std Err Mean	218.802
929	Distance	N	33
929	Distance	p value	0.7772
966	% Active	Mean	90.2044
966	% Active	Std Err Mean	2.46874
966	% Active	N	26
966	% Active	p value	0.9983
966	# Active Bouts	Mean	23.5
966	# Active Bouts	Std Err Mean	3.60523
966	# Active Bouts	N	26
966	# Active Bouts	p value	<0.0001
966	Avg. Active Bout Length	Mean	21.2322
966	Avg. Active Bout Length	Std Err Mean	3.14291
966	Avg. Active Bout Length	N	26
966	Avg. Active Bout Length	p value	1
966	Avg. Speed	Mean	1.58953
966	Avg. Speed	Std Err Mean	0.0738378
966	Avg. Speed	N	26
966	Avg. Speed	p value	0.0028
966	Avg. Accel	Mean	3.79795
966	Avg. Accel	Std Err Mean	0.279499
966	Avg. Accel	N	26
966	Avg. Accel	p value	0.0457
966	Distance	Mean	4415.43
966	Distance	Std Err Mean	262.338
966	Distance	N	26
966	Distance	p value	0.7267
974	% Active	Mean	88.6043
974	% Active	Std Err Mean	2.30081
974	% Active	N	33
974	% Active	p value	0.5032
974	# Active Bouts	Mean	21.3333
974	# Active Bouts	Std Err Mean	2.78275
974	# Active Bouts	N	33
974	# Active Bouts	p value	<0.0001
974	Avg. Active Bout Length	Mean	22.5422
974	Avg. Active Bout Length	Std Err Mean	3.42304
974	Avg. Active Bout Length	N	33
974	Avg. Active Bout Length	p value	1
974	Avg. Speed	Mean	1.59408
974	Avg. Speed	Std Err Mean	0.0650489
974	Avg. Speed	N	33
974	Avg. Speed	p value	0.0003
974	Avg. Accel	Mean	3.68758
974	Avg. Accel	Std Err Mean	0.232147
974	Avg. Accel	N	33
974	Avg. Accel	p value	0.001
974	Distance	Mean	4332.23
974	Distance	Std Err Mean	225.847
974	Distance	N	33
974	Distance	p value	0.187
977	% Active	Mean	86.9582
977	% Active	Std Err Mean	2.43245
977	% Active	N	32
977	% Active	p value	0.0493
977	# Active Bouts	Mean	24.7812
977	# Active Bouts	Std Err Mean	2.52557
977	# Active Bouts	N	32
977	# Active Bouts	p value	<0.0001
977	Avg. Active Bout Length	Mean	16.1668
977	Avg. Active Bout Length	Std Err Mean	2.08531
977	Avg. Active Bout Length	N	32
977	Avg. Active Bout Length	p value	0.9801
977	Avg. Speed	Mean	1.78021
977	Avg. Speed	Std Err Mean	0.0590139
977	Avg. Speed	N	32
977	Avg. Speed	p value	0.9911
977	Avg. Accel	Mean	4.18866
977	Avg. Accel	Std Err Mean	0.183858
977	Avg. Accel	N	32
977	Avg. Accel	p value	0.7921
977	Distance	Mean	4759.51
977	Distance	Std Err Mean	212.98
977	Distance	N	32
977	Distance	p value	1
979	% Active	Mean	93.8195
979	% Active	Std Err Mean	1.54549
979	% Active	N	34
979	% Active	p value	1
979	# Active Bouts	Mean	16.6471
979	# Active Bouts	Std Err Mean	1.71804
979	# Active Bouts	N	34
979	# Active Bouts	p value	0.0002
979	Avg. Active Bout Length	Mean	23.7868
979	Avg. Active Bout Length	Std Err Mean	2.61021
979	Avg. Active Bout Length	N	34
979	Avg. Active Bout Length	p value	1
979	Avg. Speed	Mean	1.51456
979	Avg. Speed	Std Err Mean	0.054283
979	Avg. Speed	N	34
979	Avg. Speed	p value	<0.0001
979	Avg. Accel	Mean	3.37257
979	Avg. Accel	Std Err Mean	0.203351
979	Avg. Accel	N	34
979	Avg. Accel	p value	<0.0001
979	Distance	Mean	4306.04
979	Distance	Std Err Mean	177.128
979	Distance	N	34
979	Distance	p value	0.1132
994	% Active	Mean	91.1875
994	% Active	Std Err Mean	1.60344
994	% Active	N	34
994	% Active	p value	1
994	# Active Bouts	Mean	19.5
994	# Active Bouts	Std Err Mean	2.11237
994	# Active Bouts	N	34
994	# Active Bouts	p value	<0.0001
994	Avg. Active Bout Length	Mean	22.1504
994	Avg. Active Bout Length	Std Err Mean	2.80065
994	Avg. Active Bout Length	N	34
994	Avg. Active Bout Length	p value	1
994	Avg. Speed	Mean	1.52968
994	Avg. Speed	Std Err Mean	0.0444103
994	Avg. Speed	N	34
994	Avg. Speed	p value	<0.0001
994	Avg. Accel	Mean	3.33883
994	Avg. Accel	Std Err Mean	0.163536
994	Avg. Accel	N	34
994	Avg. Accel	p value	<0.0001
994	Distance	Mean	4214.81
994	Distance	Std Err Mean	155.993
994	Distance	N	34
994	Distance	p value	0.0245
997	% Active	Mean	92.2166
997	% Active	Std Err Mean	2.02345
997	% Active	N	33
997	% Active	p value	1
997	# Active Bouts	Mean	19.3939
997	# Active Bouts	Std Err Mean	2.66747
997	# Active Bouts	N	33
997	# Active Bouts	p value	<0.0001
997	Avg. Active Bout Length	Mean	25.3268
997	Avg. Active Bout Length	Std Err Mean	3.30644
997	Avg. Active Bout Length	N	33
997	Avg. Active Bout Length	p value	1
997	Avg. Speed	Mean	1.37571
997	Avg. Speed	Std Err Mean	0.0596473
997	Avg. Speed	N	33
997	Avg. Speed	p value	<0.0001
997	Avg. Accel	Mean	2.78621
997	Avg. Accel	Std Err Mean	0.206396
997	Avg. Accel	N	33
997	Avg. Accel	p value	<0.0001
997	Distance	Mean	3881.94
997	Distance	Std Err Mean	199.587
997	Distance	N	33
997	Distance	p value	<0.0001
1003	% Active	Mean	91.0551
1003	% Active	Std Err Mean	2.92375
1003	% Active	N	27
1003	% Active	p value	1
1003	# Active Bouts	Mean	18.3704
1003	# Active Bouts	Std Err Mean	3.17538
1003	# Active Bouts	N	27
1003	# Active Bouts	p value	<0.0001
1003	Avg. Active Bout Length	Mean	29.0378
1003	Avg. Active Bout Length	Std Err Mean	4.31479
1003	Avg. Active Bout Length	N	27
1003	Avg. Active Bout Length	p value	0.9478
1003	Avg. Speed	Mean	1.80119
1003	Avg. Speed	Std Err Mean	0.0785378
1003	Avg. Speed	N	27
1003	Avg. Speed	p value	0.9999
1003	Avg. Accel	Mean	4.35012
1003	Avg. Accel	Std Err Mean	0.273478
1003	Avg. Accel	N	27
1003	Avg. Accel	p value	0.9991
1003	Distance	Mean	5089.65
1003	Distance	Std Err Mean	290.44
1003	Distance	N	27
1003	Distance	p value	1
1009	% Active	Mean	93.4596
1009	% Active	Std Err Mean	1.03053
1009	% Active	N	34
1009	% Active	p value	1
1009	# Active Bouts	Mean	21.1765
1009	# Active Bouts	Std Err Mean	1.72042
1009	# Active Bouts	N	34
1009	# Active Bouts	p value	<0.0001
1009	Avg. Active Bout Length	Mean	18.6122
1009	Avg. Active Bout Length	Std Err Mean	2.73917
1009	Avg. Active Bout Length	N	34
1009	Avg. Active Bout Length	p value	1
1009	Avg. Speed	Mean	1.54296
1009	Avg. Speed	Std Err Mean	0.0584013
1009	Avg. Speed	N	34
1009	Avg. Speed	p value	<0.0001
1009	Avg. Accel	Mean	3.50034
1009	Avg. Accel	Std Err Mean	0.222712
1009	Avg. Accel	N	34
1009	Avg. Accel	p value	<0.0001
1009	Distance	Mean	4355
1009	Distance	Std Err Mean	179.784
1009	Distance	N	34
1009	Distance	p value	0.2216
263b	% Active	Mean	88.58
263b	% Active	Std Err Mean	2.00217
263b	% Active	N	35
263b	% Active	p value	1
263b	# Active Bouts	Mean	21.6857
263b	# Active Bouts	Std Err Mean	2.26102
263b	# Active Bouts	N	35
263b	# Active Bouts	p value	<0.0001
263b	Avg. Active Bout Length	Mean	18.3558
263b	Avg. Active Bout Length	Std Err Mean	2.29502
263b	Avg. Active Bout Length	N	35
263b	Avg. Active Bout Length	p value	1
263b	Avg. Speed	Mean	1.50249
263b	Avg. Speed	Std Err Mean	0.0812636
263b	Avg. Speed	N	35
263b	Avg. Speed	p value	<0.0001
263b	Avg. Accel	Mean	3.13625
263b	Avg. Accel	Std Err Mean	0.2658
263b	Avg. Accel	N	35
263b	Avg. Accel	p value	<0.0001
263b	Distance	Mean	4107.59
263b	Distance	Std Err Mean	248.245
263b	Distance	N	35
263b	Distance	p value	0.0033
276b	% Active	Mean	92.5073
276b	% Active	Std Err Mean	1.20916
276b	% Active	N	34
276b	% Active	p value	1
276b	# Active Bouts	Mean	19.2353
276b	# Active Bouts	Std Err Mean	2.25237
276b	# Active Bouts	N	34
276b	# Active Bouts	p value	<0.0001
276b	Avg. Active Bout Length	Mean	21.8743
276b	Avg. Active Bout Length	Std Err Mean	2.42294
276b	Avg. Active Bout Length	N	34
276b	Avg. Active Bout Length	p value	1
276b	Avg. Speed	Mean	1.66422
276b	Avg. Speed	Std Err Mean	0.0580235
276b	Avg. Speed	N	34
276b	Avg. Speed	p value	0.033
276b	Avg. Accel	Mean	3.81319
276b	Avg. Accel	Std Err Mean	0.202986
276b	Avg. Accel	N	34
276b	Avg. Accel	p value	0.0082
276b	Distance	Mean	4665.99
276b	Distance	Std Err Mean	194.846
276b	Distance	N	34
276b	Distance	p value	0.9986
2a	% Active	Mean	82.3098
2a	% Active	Std Err Mean	2.08831
2a	% Active	N	34
2a	% Active	p value	<0.0001
2a	# Active Bouts	Mean	32.3824
2a	# Active Bouts	Std Err Mean	2.02701
2a	# Active Bouts	N	34
2a	# Active Bouts	p value	<0.0001
2a	Avg. Active Bout Length	Mean	9.39294
2a	Avg. Active Bout Length	Std Err Mean	1.05356
2a	Avg. Active Bout Length	N	34
2a	Avg. Active Bout Length	p value	0.0017
2a	Avg. Speed	Mean	1.42083
2a	Avg. Speed	Std Err Mean	0.0448647
2a	Avg. Speed	N	34
2a	Avg. Speed	p value	<0.0001
2a	Avg. Accel	Mean	2.9916
2a	Avg. Accel	Std Err Mean	0.155995
2a	Avg. Accel	N	34
2a	Avg. Accel	p value	<0.0001
2a	Distance	Mean	3587.96
2a	Distance	Std Err Mean	172.141
2a	Distance	N	34
2a	Distance	p value	<0.0001
2c	% Active	Mean	92.2945
2c	% Active	Std Err Mean	1.33658
2c	% Active	N	34
2c	% Active	p value	1
2c	# Active Bouts	Mean	20.1765
2c	# Active Bouts	Std Err Mean	1.69063
2c	# Active Bouts	N	34
2c	# Active Bouts	p value	<0.0001
2c	Avg. Active Bout Length	Mean	18.3111
2c	Avg. Active Bout Length	Std Err Mean	2.02965
2c	Avg. Active Bout Length	N	34
2c	Avg. Active Bout Length	p value	1
2c	Avg. Speed	Mean	1.55788
2c	Avg. Speed	Std Err Mean	0.0421653
2c	Avg. Speed	N	34
2c	Avg. Speed	p value	<0.0001
2c	Avg. Accel	Mean	3.49348
2c	Avg. Accel	Std Err Mean	0.160379
2c	Avg. Accel	N	34
2c	Avg. Accel	p value	<0.0001
2c	Distance	Mean	4329.26
2c	Distance	Std Err Mean	138.004
2c	Distance	N	34
2c	Distance	p value	0.1579
31a	% Active	Mean	92.3375
31a	% Active	Std Err Mean	1.00321
31a	% Active	N	30
31a	% Active	p value	1
31a	# Active Bouts	Mean	20.4667
31a	# Active Bouts	Std Err Mean	2.12253
31a	# Active Bouts	N	30
31a	# Active Bouts	p value	<0.0001
31a	Avg. Active Bout Length	Mean	20.4483
31a	Avg. Active Bout Length	Std Err Mean	2.91694
31a	Avg. Active Bout Length	N	30
31a	Avg. Active Bout Length	p value	1
31a	Avg. Speed	Mean	1.5052
31a	Avg. Speed	Std Err Mean	0.0592161
31a	Avg. Speed	N	30
31a	Avg. Speed	p value	<0.0001
31a	Avg. Accel	Mean	3.19174
31a	Avg. Accel	Std Err Mean	0.215411
31a	Avg. Accel	N	30
31a	Avg. Accel	p value	<0.0001
31a	Distance	Mean	4203.64
31a	Distance	Std Err Mean	188.966
31a	Distance	N	30
31a	Distance	p value	0.0463
9b	% Active	Mean	82.5895
9b	% Active	Std Err Mean	2.05924
9b	% Active	N	35
9b	% Active	p value	<0.0001
9b	# Active Bouts	Mean	35.7429
9b	# Active Bouts	Std Err Mean	2.36051
9b	# Active Bouts	N	35
9b	# Active Bouts	p value	<0.0001
9b	Avg. Active Bout Length	Mean	8.79588
9b	Avg. Active Bout Length	Std Err Mean	0.954766
9b	Avg. Active Bout Length	N	35
9b	Avg. Active Bout Length	p value	0.0004
9b	Avg. Speed	Mean	1.46667
9b	Avg. Speed	Std Err Mean	0.0418681
9b	Avg. Speed	N	35
9b	Avg. Speed	p value	<0.0001
9b	Avg. Accel	Mean	3.13836
9b	Avg. Accel	Std Err Mean	0.145433
9b	Avg. Accel	N	35
9b	Avg. Accel	p value	<0.0001
9b	Distance	Mean	3697.04
9b	Distance	Std Err Mean	166.385
9b	Distance	N	35
9b	Distance	p value	<0.0001
Scram	% Active	Mean	93.7935
Scram	% Active	Std Err Mean	0.344823
Scram	% Active	N	388
Scram	% Active	p value	N/A
Scram	# Active Bouts	Mean	5.97423
Scram	# Active Bouts	Std Err Mean	0.219154
Scram	# Active Bouts	N	388
Scram	# Active Bouts	p value	N/A
Scram	Avg. Active Bout Length	Mean	22.1197
Scram	Avg. Active Bout Length	Std Err Mean	0.677379
Scram	Avg. Active Bout Length	N	388
Scram	Avg. Active Bout Length	p value	N/A
Scram	Avg. Speed	Mean	1.90782
Scram	Avg. Speed	Std Err Mean	0.0170817
Scram	Avg. Speed	N	388
Scram	Avg. Speed	p value	N/A
Scram	Avg. Accel	Mean	4.80273
Scram	Avg. Accel	Std Err Mean	0.0653504
Scram	Avg. Accel	N	388
Scram	Avg. Accel	p value	N/A
Scram	Distance	Mean	5034.54
Scram	Distance	Std Err Mean	52.4802
Scram	Distance	N	388
Scram	Distance	p value	N/A

## Sheet: TubG4G80
DATA FILTERS
Mir Line	Parameter	Stat	Value
282	% Active	Mean	91.1085
282	% Active	Std Err Mean	2.1424
282	% Active	N	35
282	% Active	p value	0.3825
282	# Active Bouts	Mean	17.6
282	# Active Bouts	Std Err Mean	2.43027
282	# Active Bouts	N	35
282	# Active Bouts	p value	0.3597
282	Avg Active Bout Length	Mean	25.0916
282	Avg Active Bout Length	Std Err Mean	3.24623
282	Avg Active Bout Length	N	35
282	Avg Active Bout Length	p value	0.0491
282	Avg Speed	Mean	1.15478
282	Avg Speed	Std Err Mean	0.0421855
282	Avg Speed	N	35
282	Avg Speed	p value	0.9849
282	Avg Accel	Mean	2.27859
282	Avg Accel	Std Err Mean	0.163167
282	Avg Accel	N	35
282	Avg Accel	p value	0.9946
282	Distance	Mean	3234.81
282	Distance	Std Err Mean	134.355
282	Distance	N	35
282	Distance	p value	1
994	% Active	Mean	93.1144
994	% Active	Std Err Mean	0.981675
994	% Active	N	36
994	% Active	p value	0.0343
994	# Active Bouts	Mean	15.1111
994	# Active Bouts	Std Err Mean	1.57045
994	# Active Bouts	N	36
994	# Active Bouts	p value	0.0282
994	Avg Active Bout Length	Mean	29.0199
994	Avg Active Bout Length	Std Err Mean	3.76413
994	Avg Active Bout Length	N	36
994	Avg Active Bout Length	p value	0.0002
994	Avg Speed	Mean	1.21037
994	Avg Speed	Std Err Mean	0.0355864
994	Avg Speed	N	36
994	Avg Speed	p value	1
994	Avg Accel	Mean	2.43382
994	Avg Accel	Std Err Mean	0.132681
994	Avg Accel	N	36
994	Avg Accel	p value	1
994	Distance	Mean	3400.97
994	Distance	Std Err Mean	111.184
994	Distance	N	36
994	Distance	p value	0.9823
263b	% Active	Mean	90.9877
263b	% Active	Std Err Mean	1.68082
263b	% Active	N	36
263b	% Active	p value	0.4015
263b	# Active Bouts	Mean	17.1944
263b	# Active Bouts	Std Err Mean	2.04971
263b	# Active Bouts	N	36
263b	# Active Bouts	p value	0.2508
263b	Avg Active Bout Length	Mean	22.727
263b	Avg Active Bout Length	Std Err Mean	2.30621
263b	Avg Active Bout Length	N	36
263b	Avg Active Bout Length	p value	0.3735
263b	Avg Speed	Mean	1.36463
263b	Avg Speed	Std Err Mean	0.0532545
263b	Avg Speed	N	36
263b	Avg Speed	p value	0.0602
263b	Avg Accel	Mean	2.89981
263b	Avg Accel	Std Err Mean	0.186403
263b	Avg Accel	N	36
263b	Avg Accel	p value	0.2815
263b	Distance	Mean	3786.78
263b	Distance	Std Err Mean	168.315
263b	Distance	N	36
263b	Distance	p value	0.0236
scram	% Active	Mean	86.2125
scram	% Active	Std Err Mean	0.7653
scram	% Active	N	250
scram	% Active	p value	N/A
scram	# Active Bouts	Mean	23.612
scram	# Active Bouts	Std Err Mean	0.905896
scram	# Active Bouts	N	250
scram	# Active Bouts	p value	N/A
scram	Avg Active Bout Length	Mean	16.3916
scram	Avg Active Bout Length	Std Err Mean	0.766988
scram	Avg Active Bout Length	N	250
scram	Avg Active Bout Length	p value	N/A
scram	Avg Speed	Mean	1.21
scram	Avg Speed	Std Err Mean	0.0177831
scram	Avg Speed	N	250
scram	Avg Speed	p value	N/A
scram	Avg Accel	Mean	2.45234
scram	Avg Accel	Std Err Mean	0.0649409
scram	Avg Accel	N	250
scram	Avg Accel	p value	N/A
scram	Distance	Mean	3212.16
scram	Distance	Std Err Mean	60.2402
scram	Distance	N	250
scram	Distance	p value	N/A

## Sheet: Larval ELAV
DATA FILTERS
Mir Line	Parameter	Stat	Value
3	# Active Bouts	Mean	14.5417
3	# Active Bouts	Std Err Mean	1.0303
3	# Active Bouts	N	24
3	# Active Bouts	p value	0.5558
3	Avg. Active Bout Length	Mean	21.0978
3	Avg. Active Bout Length	Std Err Mean	1.69967
3	Avg. Active Bout Length	N	24
3	Avg. Active Bout Length	p value	0.4596
3	Speed	Mean	0.413192
3	Speed	Std Err Mean	0.0205576
3	Speed	N	24
3	Speed	p value	0.4671
3	Accel	Mean	0.0823495
3	Accel	Std Err Mean	0.00316707
3	Accel	N	24
3	Accel	p value	1
3	Distance	Mean	155.579
3	Distance	Std Err Mean	12.392
3	Distance	N	24
3	Distance	p value	0.0103
4	# Active Bouts	Mean	18.7619
4	# Active Bouts	Std Err Mean	1.16067
4	# Active Bouts	N	21
4	# Active Bouts	p value	1
4	Avg. Active Bout Length	Mean	17.3956
4	Avg. Active Bout Length	Std Err Mean	1.25176
4	Avg. Active Bout Length	N	21
4	Avg. Active Bout Length	p value	1
4	Speed	Mean	0.454337
4	Speed	Std Err Mean	0.0129752
4	Speed	N	21
4	Speed	p value	0.0004
4	Accel	Mean	0.0959102
4	Accel	Std Err Mean	0.00485405
4	Accel	N	21
4	Accel	p value	0.0251
4	Distance	Mean	163.736
4	Distance	Std Err Mean	5.45517
4	Distance	N	21
4	Distance	p value	0.0006
6	# Active Bouts	Mean	18.9556
6	# Active Bouts	Std Err Mean	1.42097
6	# Active Bouts	N	45
6	# Active Bouts	p value	1
6	Avg. Active Bout Length	Mean	19.9484
6	Avg. Active Bout Length	Std Err Mean	1.76141
6	Avg. Active Bout Length	N	45
6	Avg. Active Bout Length	p value	1
6	Speed	Mean	0.471464
6	Speed	Std Err Mean	0.0178036
6	Speed	N	45
6	Speed	p value	<0.0001
6	Accel	Mean	0.111881
6	Accel	Std Err Mean	0.00510856
6	Accel	N	45
6	Accel	p value	<0.0001
6	Distance	Mean	167.64
6	Distance	Std Err Mean	10.1386
6	Distance	N	45
6	Distance	p value	<0.0001
7	# Active Bouts	Mean	10.6842
7	# Active Bouts	Std Err Mean	1.2332
7	# Active Bouts	N	19
7	# Active Bouts	p value	0.0019
7	Avg. Active Bout Length	Mean	39.994
7	Avg. Active Bout Length	Std Err Mean	6.33351
7	Avg. Active Bout Length	N	19
7	Avg. Active Bout Length	p value	0.0001
7	Speed	Mean	0.391626
7	Speed	Std Err Mean	0.0184616
7	Speed	N	19
7	Speed	p value	1
7	Accel	Mean	0.066454
7	Accel	Std Err Mean	0.00154102
7	Accel	N	19
7	Accel	p value	1
7	Distance	Mean	155.44
7	Distance	Std Err Mean	11.6535
7	Distance	N	19
7	Distance	p value	0.0723
14	# Active Bouts	Mean	9.75
14	# Active Bouts	Std Err Mean	0.817656
14	# Active Bouts	N	12
14	# Active Bouts	p value	0.0058
14	Avg. Active Bout Length	Mean	33.1637
14	Avg. Active Bout Length	Std Err Mean	2.83461
14	Avg. Active Bout Length	N	12
14	Avg. Active Bout Length	p value	0.0196
14	Speed	Mean	0.34212
14	Speed	Std Err Mean	0.0149293
14	Speed	N	12
14	Speed	p value	1
14	Accel	Mean	0.0480153
14	Accel	Std Err Mean	0.0028555
14	Accel	N	12
14	Accel	p value	0.0001
14	Distance	Mean	125.863
14	Distance	Std Err Mean	5.5587
14	Distance	N	12
14	Distance	p value	1
184	# Active Bouts	Mean	7.7037
184	# Active Bouts	Std Err Mean	1.10401
184	# Active Bouts	N	27
184	# Active Bouts	p value	<0.0001
184	Avg. Active Bout Length	Mean	64.6654
184	Avg. Active Bout Length	Std Err Mean	8.76436
184	Avg. Active Bout Length	N	27
184	Avg. Active Bout Length	p value	<0.0001
184	Speed	Mean	0.31094
184	Speed	Std Err Mean	0.00961802
184	Speed	N	27
184	Speed	p value	1
184	Accel	Mean	0.0488663
184	Accel	Std Err Mean	0.00199415
184	Accel	N	27
184	Accel	p value	<0.0001
184	Distance	Mean	118.034
184	Distance	Std Err Mean	4.89686
184	Distance	N	27
184	Distance	p value	1
190	# Active Bouts	Mean	9.96296
190	# Active Bouts	Std Err Mean	0.848128
190	# Active Bouts	N	27
190	# Active Bouts	p value	<0.0001
190	Avg. Active Bout Length	Mean	33.6966
190	Avg. Active Bout Length	Std Err Mean	2.89106
190	Avg. Active Bout Length	N	27
190	Avg. Active Bout Length	p value	<0.0001
190	Speed	Mean	0.385199
190	Speed	Std Err Mean	0.0266301
190	Speed	N	27
190	Speed	p value	1
190	Accel	Mean	0.0711135
190	Accel	Std Err Mean	0.00421588
190	Accel	N	27
190	Accel	p value	1
190	Distance	Mean	132.344
190	Distance	Std Err Mean	10.9479
190	Distance	N	27
190	Distance	p value	1
210	# Active Bouts	Mean	13.0435
210	# Active Bouts	Std Err Mean	1.71194
210	# Active Bouts	N	23
210	# Active Bouts	p value	0.4835
210	Avg. Active Bout Length	Mean	41.073
210	Avg. Active Bout Length	Std Err Mean	7.58556
210	Avg. Active Bout Length	N	23
210	Avg. Active Bout Length	p value	0.015
210	Speed	Mean	0.458755
210	Speed	Std Err Mean	0.0186476
210	Speed	N	23
210	Speed	p value	<0.0001
210	Accel	Mean	0.0804345
210	Accel	Std Err Mean	0.00360119
210	Accel	N	23
210	Accel	p value	1
210	Distance	Mean	176.434
210	Distance	Std Err Mean	11.7856
210	Distance	N	23
210	Distance	p value	<0.0001
274	# Active Bouts	Mean	10.9524
274	# Active Bouts	Std Err Mean	1.8001
274	# Active Bouts	N	21
274	# Active Bouts	p value	0.0125
274	Avg. Active Bout Length	Mean	42.1135
274	Avg. Active Bout Length	Std Err Mean	5.58087
274	Avg. Active Bout Length	N	21
274	Avg. Active Bout Length	p value	0.002
274	Speed	Mean	0.311692
274	Speed	Std Err Mean	0.0112006
274	Speed	N	21
274	Speed	p value	1
274	Accel	Mean	0.0516776
274	Accel	Std Err Mean	0.00250198
274	Accel	N	21
274	Accel	p value	<0.0001
274	Distance	Mean	110.037
274	Distance	Std Err Mean	5.66616
274	Distance	N	21
274	Distance	p value	1
276*	# Active Bouts	Mean	16.5455
276*	# Active Bouts	Std Err Mean	2.03617
276*	# Active Bouts	N	22
276*	# Active Bouts	p value	1
276*	Avg. Active Bout Length	Mean	26.2694
276*	Avg. Active Bout Length	Std Err Mean	3.87905
276*	Avg. Active Bout Length	N	22
276*	Avg. Active Bout Length	p value	0.9893
276*	Speed	Mean	0.441384
276*	Speed	Std Err Mean	0.0227699
276*	Speed	N	22
276*	Speed	p value	0.0054
276*	Accel	Mean	0.0838743
276*	Accel	Std Err Mean	0.0046746
276*	Accel	N	22
276*	Accel	p value	1
276*	Distance	Mean	159.098
276*	Distance	Std Err Mean	11.0863
276*	Distance	N	22
276*	Distance	p value	0.0042
281	# Active Bouts	Mean	19.2083
281	# Active Bouts	Std Err Mean	1.51798
281	# Active Bouts	N	24
281	# Active Bouts	p value	1
281	Avg. Active Bout Length	Mean	17.2023
281	Avg. Active Bout Length	Std Err Mean	1.72709
281	Avg. Active Bout Length	N	24
281	Avg. Active Bout Length	p value	1
281	Speed	Mean	0.223322
281	Speed	Std Err Mean	0.0111464
281	Speed	N	24
281	Speed	p value	<0.0001
281	Accel	Mean	0.0558368
281	Accel	Std Err Mean	0.00147932
281	Accel	N	24
281	Accel	p value	<0.0001
281	Distance	Mean	73.7826
281	Distance	Std Err Mean	3.84714
281	Distance	N	24
281	Distance	p value	0.0186
303	# Active Bouts	Mean	15.8636
303	# Active Bouts	Std Err Mean	1.76338
303	# Active Bouts	N	22
303	# Active Bouts	p value	1
303	Avg. Active Bout Length	Mean	28.4583
303	Avg. Active Bout Length	Std Err Mean	3.53146
303	Avg. Active Bout Length	N	22
303	Avg. Active Bout Length	p value	0.031
303	Speed	Mean	0.407151
303	Speed	Std Err Mean	0.0141235
303	Speed	N	22
303	Speed	p value	0.8511
303	Accel	Mean	0.0728168
303	Accel	Std Err Mean	0.00404518
303	Accel	N	22
303	Accel	p value	1
303	Distance	Mean	155.627
303	Distance	Std Err Mean	7.96435
303	Distance	N	22
303	Distance	p value	0.0218
304	# Active Bouts	Mean	14.8889
304	# Active Bouts	Std Err Mean	1.34033
304	# Active Bouts	N	36
304	# Active Bouts	p value	0.6129
304	Avg. Active Bout Length	Mean	28.4849
304	Avg. Active Bout Length	Std Err Mean	3.36132
304	Avg. Active Bout Length	N	36
304	Avg. Active Bout Length	p value	0.0006
304	Speed	Mean	0.326775
304	Speed	Std Err Mean	0.0131921
304	Speed	N	36
304	Speed	p value	1
304	Accel	Mean	0.0621077
304	Accel	Std Err Mean	0.00272399
304	Accel	N	36
304	Accel	p value	0.0056
304	Distance	Mean	111.042
304	Distance	Std Err Mean	5.37073
304	Distance	N	36
304	Distance	p value	1
306	# Active Bouts	Mean	21.1111
306	# Active Bouts	Std Err Mean	1.36116
306	# Active Bouts	N	45
306	# Active Bouts	p value	1
306	Avg. Active Bout Length	Mean	15.5728
306	Avg. Active Bout Length	Std Err Mean	1.62007
306	Avg. Active Bout Length	N	45
306	Avg. Active Bout Length	p value	1
306	Speed	Mean	0.399067
306	Speed	Std Err Mean	0.0106153
306	Speed	N	45
306	Speed	p value	0.3496
306	Accel	Mean	0.09352
306	Accel	Std Err Mean	0.00343887
306	Accel	N	45
306	Accel	p value	0.0002
306	Distance	Mean	123.433
306	Distance	Std Err Mean	5.39148
306	Distance	N	45
306	Distance	p value	1
308	# Active Bouts	Mean	15.7222
308	# Active Bouts	Std Err Mean	1.30811
308	# Active Bouts	N	18
308	# Active Bouts	p value	0.9964
308	Avg. Active Bout Length	Mean	23.1192
308	Avg. Active Bout Length	Std Err Mean	1.83091
308	Avg. Active Bout Length	N	18
308	Avg. Active Bout Length	p value	0.1489
308	Speed	Mean	0.429357
308	Speed	Std Err Mean	0.0101628
308	Speed	N	18
308	Speed	p value	0.2205
308	Accel	Mean	0.0825391
308	Accel	Std Err Mean	0.00393778
308	Accel	N	18
308	Accel	p value	1
308	Distance	Mean	162.644
308	Distance	Std Err Mean	6.91319
308	Distance	N	18
308	Distance	p value	0.0062
310	# Active Bouts	Mean	12.65
310	# Active Bouts	Std Err Mean	1.48904
310	# Active Bouts	N	20
310	# Active Bouts	p value	0.1137
310	Avg. Active Bout Length	Mean	29.2162
310	Avg. Active Bout Length	Std Err Mean	3.19555
310	Avg. Active Bout Length	N	20
310	Avg. Active Bout Length	p value	0.0229
310	Speed	Mean	0.436129
310	Speed	Std Err Mean	0.0105315
310	Speed	N	20
310	Speed	p value	0.0383
310	Accel	Mean	0.0735899
310	Accel	Std Err Mean	0.00389178
310	Accel	N	20
310	Accel	p value	1
310	Distance	Mean	146.081
310	Distance	Std Err Mean	6.77535
310	Distance	N	20
310	Distance	p value	0.6537
312	# Active Bouts	Mean	17.1765
312	# Active Bouts	Std Err Mean	2.026
312	# Active Bouts	N	17
312	# Active Bouts	p value	1
312	Avg. Active Bout Length	Mean	21.2235
312	Avg. Active Bout Length	Std Err Mean	1.98069
312	Avg. Active Bout Length	N	17
312	Avg. Active Bout Length	p value	0.8633
312	Speed	Mean	0.455206
312	Speed	Std Err Mean	0.0103995
312	Speed	N	17
312	Speed	p value	0.0037
312	Accel	Mean	0.0847875
312	Accel	Std Err Mean	0.00485602
312	Accel	N	17
312	Accel	p value	1
312	Distance	Mean	163.405
312	Distance	Std Err Mean	9.84281
312	Distance	N	17
312	Distance	p value	0.0079
959	# Active Bouts	Mean	10.4375
959	# Active Bouts	Std Err Mean	1.28766
959	# Active Bouts	N	16
959	# Active Bouts	p value	0.0061
959	Avg. Active Bout Length	Mean	28.4391
959	Avg. Active Bout Length	Std Err Mean	3.3272
959	Avg. Active Bout Length	N	16
959	Avg. Active Bout Length	p value	0.1529
959	Speed	Mean	0.300428
959	Speed	Std Err Mean	0.0160403
959	Speed	N	16
959	Speed	p value	1
959	Accel	Mean	0.0508979
959	Accel	Std Err Mean	0.00289377
959	Accel	N	16
959	Accel	p value	<0.0001
959	Distance	Mean	110.238
959	Distance	Std Err Mean	6.47278
959	Distance	N	16
959	Distance	p value	1
961	# Active Bouts	Mean	14.2778
961	# Active Bouts	Std Err Mean	1.90939
961	# Active Bouts	N	18
961	# Active Bouts	p value	0.9882
961	Avg. Active Bout Length	Mean	32.3625
961	Avg. Active Bout Length	Std Err Mean	5.05749
961	Avg. Active Bout Length	N	18
961	Avg. Active Bout Length	p value	0.0018
961	Speed	Mean	0.370074
961	Speed	Std Err Mean	0.0220538
961	Speed	N	18
961	Speed	p value	1
961	Accel	Mean	0.0726871
961	Accel	Std Err Mean	0.00447484
961	Accel	N	18
961	Accel	p value	1
961	Distance	Mean	132.641
961	Distance	Std Err Mean	7.6539
961	Distance	N	18
961	Distance	p value	1
962	# Active Bouts	Mean	14.5357
962	# Active Bouts	Std Err Mean	1.68834
962	# Active Bouts	N	28
962	# Active Bouts	p value	0.2863
962	Avg. Active Bout Length	Mean	28.9923
962	Avg. Active Bout Length	Std Err Mean	3.76997
962	Avg. Active Bout Length	N	28
962	Avg. Active Bout Length	p value	0.0025
962	Speed	Mean	0.480427
962	Speed	Std Err Mean	0.0190698
962	Speed	N	28
962	Speed	p value	<0.0001
962	Accel	Mean	0.0889771
962	Accel	Std Err Mean	0.00392848
962	Accel	N	28
962	Accel	p value	0.7821
962	Distance	Mean	173.427
962	Distance	Std Err Mean	11.0952
962	Distance	N	28
962	Distance	p value	<0.0001
964	# Active Bouts	Mean	14.1579
964	# Active Bouts	Std Err Mean	1.17792
964	# Active Bouts	N	19
964	# Active Bouts	p value	0.5635
964	Avg. Active Bout Length	Mean	23.6655
964	Avg. Active Bout Length	Std Err Mean	1.95135
964	Avg. Active Bout Length	N	19
964	Avg. Active Bout Length	p value	0.1047
964	Speed	Mean	0.461025
964	Speed	Std Err Mean	0.0161861
964	Speed	N	19
964	Speed	p value	0.0002
964	Accel	Mean	0.0879878
964	Accel	Std Err Mean	0.00414581
964	Accel	N	19
964	Accel	p value	0.999
964	Distance	Mean	156.083
964	Distance	Std Err Mean	7.4538
964	Distance	N	19
964	Distance	p value	0.0573
965	# Active Bouts	Mean	11.5263
965	# Active Bouts	Std Err Mean	1.47567
965	# Active Bouts	N	19
965	# Active Bouts	p value	0.0362
965	Avg. Active Bout Length	Mean	34.5682
965	Avg. Active Bout Length	Std Err Mean	5.25139
965	Avg. Active Bout Length	N	19
965	Avg. Active Bout Length	p value	<0.0001
965	Speed	Mean	0.337771
965	Speed	Std Err Mean	0.0177109
965	Speed	N	19
965	Speed	p value	1
965	Accel	Mean	0.062183
965	Accel	Std Err Mean	0.00277134
965	Accel	N	19
965	Accel	p value	0.4075
965	Distance	Mean	115.603
965	Distance	Std Err Mean	7.354
965	Distance	N	19
965	Distance	p value	1
966	# Active Bouts	Mean	11.8667
966	# Active Bouts	Std Err Mean	1.01453
966	# Active Bouts	N	30
966	# Active Bouts	p value	0.0002
966	Avg. Active Bout Length	Mean	30.928
966	Avg. Active Bout Length	Std Err Mean	3.33933
966	Avg. Active Bout Length	N	30
966	Avg. Active Bout Length	p value	0.0004
966	Speed	Mean	0.413134
966	Speed	Std Err Mean	0.0193582
966	Speed	N	30
966	Speed	p value	0.1887
966	Accel	Mean	0.0698482
966	Accel	Std Err Mean	0.00270294
966	Accel	N	30
966	Accel	p value	0.9999
966	Distance	Mean	135.634
966	Distance	Std Err Mean	7.52642
966	Distance	N	30
966	Distance	p value	0.9849
972	# Active Bouts	Mean	6.91667
972	# Active Bouts	Std Err Mean	0.955375
972	# Active Bouts	N	24
972	# Active Bouts	p value	<0.0001
972	Avg. Active Bout Length	Mean	64.3721
972	Avg. Active Bout Length	Std Err Mean	7.004
972	Avg. Active Bout Length	N	24
972	Avg. Active Bout Length	p value	<0.0001
972	Speed	Mean	0.487599
972	Speed	Std Err Mean	0.0149562
972	Speed	N	24
972	Speed	p value	<0.0001
972	Accel	Mean	0.0892335
972	Accel	Std Err Mean	0.00298596
972	Accel	N	24
972	Accel	p value	0.8343
972	Distance	Mean	179.996
972	Distance	Std Err Mean	8.14908
972	Distance	N	24
972	Distance	p value	<0.0001
973	# Active Bouts	Mean	18.625
973	# Active Bouts	Std Err Mean	1.53535
973	# Active Bouts	N	16
973	# Active Bouts	p value	1
973	Avg. Active Bout Length	Mean	21.8798
973	Avg. Active Bout Length	Std Err Mean	1.93039
973	Avg. Active Bout Length	N	16
973	Avg. Active Bout Length	p value	0.5889
973	Speed	Mean	0.437899
973	Speed	Std Err Mean	0.0227423
973	Speed	N	16
973	Speed	p value	0.1327
973	Accel	Mean	0.0814745
973	Accel	Std Err Mean	0.00395934
973	Accel	N	16
973	Accel	p value	1
973	Distance	Mean	183.285
973	Distance	Std Err Mean	13.841
973	Distance	N	16
973	Distance	p value	<0.0001
979	# Active Bouts	Mean	11.0909
979	# Active Bouts	Std Err Mean	0.789293
979	# Active Bouts	N	22
979	# Active Bouts	p value	<0.0001
979	Avg. Active Bout Length	Mean	27.4565
979	Avg. Active Bout Length	Std Err Mean	3.00538
979	Avg. Active Bout Length	N	22
979	Avg. Active Bout Length	p value	0.0738
979	Speed	Mean	0.416717
979	Speed	Std Err Mean	0.0211366
979	Speed	N	22
979	Speed	p value	0.4285
979	Accel	Mean	0.0772209
979	Accel	Std Err Mean	0.00388633
979	Accel	N	22
979	Accel	p value	1
979	Distance	Mean	134.078
979	Distance	Std Err Mean	8.84956
979	Distance	N	22
979	Distance	p value	1
985	# Active Bouts	Mean	13.3333
985	# Active Bouts	Std Err Mean	1.01073
985	# Active Bouts	N	48
985	# Active Bouts	p value	0.0007
985	Avg. Active Bout Length	Mean	26.3069
985	Avg. Active Bout Length	Std Err Mean	2.58604
985	Avg. Active Bout Length	N	48
985	Avg. Active Bout Length	p value	0.0685
985	Speed	Mean	0.343271
985	Speed	Std Err Mean	0.0138505
985	Speed	N	48
985	Speed	p value	1
985	Accel	Mean	0.0636553
985	Accel	Std Err Mean	0.00206304
985	Accel	N	48
985	Accel	p value	0.0037
985	Distance	Mean	117.376
985	Distance	Std Err Mean	6.35769
985	Distance	N	48
985	Distance	p value	1
988	# Active Bouts	Mean	8.72222
988	# Active Bouts	Std Err Mean	1.27522
988	# Active Bouts	N	18
988	# Active Bouts	p value	0.0001
988	Avg. Active Bout Length	Mean	45.1789
988	Avg. Active Bout Length	Std Err Mean	6.04738
988	Avg. Active Bout Length	N	18
988	Avg. Active Bout Length	p value	0.0001
988	Speed	Mean	0.460521
988	Speed	Std Err Mean	0.0250429
988	Speed	N	18
988	Speed	p value	0.0006
988	Accel	Mean	0.0673857
988	Accel	Std Err Mean	0.00211677
988	Accel	N	18
988	Accel	p value	0.9997
988	Distance	Mean	161.843
988	Distance	Std Err Mean	11.2758
988	Distance	N	18
988	Distance	p value	0.0089
991	# Active Bouts	Mean	10.2381
991	# Active Bouts	Std Err Mean	1.1082
991	# Active Bouts	N	21
991	# Active Bouts	p value	<0.0001
991	Avg. Active Bout Length	Mean	40.4496
991	Avg. Active Bout Length	Std Err Mean	5.44927
991	Avg. Active Bout Length	N	21
991	Avg. Active Bout Length	p value	<0.0001
991	Speed	Mean	0.286821
991	Speed	Std Err Mean	0.0128104
991	Speed	N	21
991	Speed	p value	0.8694
991	Accel	Mean	0.0510804
991	Accel	Std Err Mean	0.00208091
991	Accel	N	21
991	Accel	p value	<0.0001
991	Distance	Mean	100.596
991	Distance	Std Err Mean	4.67527
991	Distance	N	21
991	Distance	p value	1
992	# Active Bouts	Mean	11.8333
992	# Active Bouts	Std Err Mean	1.61134
992	# Active Bouts	N	18
992	# Active Bouts	p value	0.1478
992	Avg. Active Bout Length	Mean	33.7254
992	Avg. Active Bout Length	Std Err Mean	6.70318
992	Avg. Active Bout Length	N	18
992	Avg. Active Bout Length	p value	0.0004
992	Speed	Mean	0.409898
992	Speed	Std Err Mean	0.0266408
992	Speed	N	18
992	Speed	p value	0.9992
992	Accel	Mean	0.0743965
992	Accel	Std Err Mean	0.00313872
992	Accel	N	18
992	Accel	p value	1
992	Distance	Mean	121.298
992	Distance	Std Err Mean	9.13377
992	Distance	N	18
992	Distance	p value	1
997	# Active Bouts	Mean	12.0588
997	# Active Bouts	Std Err Mean	2.48447
997	# Active Bouts	N	17
997	# Active Bouts	p value	0.4664
997	Avg. Active Bout Length	Mean	41.9492
997	Avg. Active Bout Length	Std Err Mean	8.73538
997	Avg. Active Bout Length	N	17
997	Avg. Active Bout Length	p value	<0.0001
997	Speed	Mean	0.387482
997	Speed	Std Err Mean	0.0213245
997	Speed	N	17
997	Speed	p value	1
997	Accel	Mean	0.0647654
997	Accel	Std Err Mean	0.00388674
997	Accel	N	17
997	Accel	p value	0.9578
997	Distance	Mean	139.196
997	Distance	Std Err Mean	10.4762
997	Distance	N	17
997	Distance	p value	0.9991
999	# Active Bouts	Mean	20.6
999	# Active Bouts	Std Err Mean	1.87667
999	# Active Bouts	N	15
999	# Active Bouts	p value	1
999	Avg. Active Bout Length	Mean	17.5569
999	Avg. Active Bout Length	Std Err Mean	1.22216
999	Avg. Active Bout Length	N	15
999	Avg. Active Bout Length	p value	1
999	Speed	Mean	0.484221
999	Speed	Std Err Mean	0.025808
999	Speed	N	15
999	Speed	p value	0.9994
999	Accel	Mean	0.103643
999	Accel	Std Err Mean	0.00536685
999	Accel	N	15
999	Accel	p value	0.0003
999	Distance	Mean	188.806
999	Distance	Std Err Mean	14.9405
999	Distance	N	15
999	Distance	p value	<0.0001
1002	# Active Bouts	Mean	20.8571
1002	# Active Bouts	Std Err Mean	1.23412
1002	# Active Bouts	N	28
1002	# Active Bouts	p value	1
1002	Avg. Active Bout Length	Mean	13.7924
1002	Avg. Active Bout Length	Std Err Mean	1.16502
1002	Avg. Active Bout Length	N	28
1002	Avg. Active Bout Length	p value	1
1002	Speed	Mean	0.207196
1002	Speed	Std Err Mean	0.00865025
1002	Speed	N	28
1002	Speed	p value	<0.0001
1002	Accel	Mean	0.0610377
1002	Accel	Std Err Mean	0.0014927
1002	Accel	N	28
1002	Accel	p value	0.0144
1002	Distance	Mean	69.7743
1002	Distance	Std Err Mean	3.61896
1002	Distance	N	28
1002	Distance	p value	0.0004
1005	# Active Bouts	Mean	19.381
1005	# Active Bouts	Std Err Mean	1.93523
1005	# Active Bouts	N	21
1005	# Active Bouts	p value	1
1005	Avg. Active Bout Length	Mean	19.4909
1005	Avg. Active Bout Length	Std Err Mean	2.04889
1005	Avg. Active Bout Length	N	21
1005	Avg. Active Bout Length	p value	1
1005	Speed	Mean	0.412939
1005	Speed	Std Err Mean	0.0207787
1005	Speed	N	21
1005	Speed	p value	0.6742
1005	Accel	Mean	0.0913771
1005	Accel	Std Err Mean	0.00434205
1005	Accel	N	21
1005	Accel	p value	0.6128
1005	Distance	Mean	159.446
1005	Distance	Std Err Mean	12.592
1005	Distance	N	21
1005	Distance	p value	0.0057
1011	# Active Bouts	Mean	10.5
1011	# Active Bouts	Std Err Mean	1.12677
1011	# Active Bouts	N	18
1011	# Active Bouts	p value	0.0015
1011	Avg. Active Bout Length	Mean	32.3483
1011	Avg. Active Bout Length	Std Err Mean	4.63277
1011	Avg. Active Bout Length	N	18
1011	Avg. Active Bout Length	p value	0.0251
1011	Speed	Mean	0.434713
1011	Speed	Std Err Mean	0.0327567
1011	Speed	N	18
1011	Speed	p value	0.1028
1011	Accel	Mean	0.0745792
1011	Accel	Std Err Mean	0.00552724
1011	Accel	N	18
1011	Accel	p value	1
1011	Distance	Mean	147.399
1011	Distance	Std Err Mean	13.5408
1011	Distance	N	18
1011	Distance	p value	0.6799
1016	# Active Bouts	Mean	12
1016	# Active Bouts	Std Err Mean	3
1016	# Active Bouts	N	16
1016	# Active Bouts	p value	0.0015
1016	Avg. Active Bout Length	Mean	60.3764
1016	Avg. Active Bout Length	Std Err Mean	14.746
1016	Avg. Active Bout Length	N	16
1016	Avg. Active Bout Length	p value	0.0251
1016	Speed	Mean	0.384187
1016	Speed	Std Err Mean	0.0223214
1016	Speed	N	16
1016	Speed	p value	0.1028
1016	Accel	Mean	0.0665762
1016	Accel	Std Err Mean	0.00678988
1016	Accel	N	16
1016	Accel	p value	1
1016	Distance	Mean	136.273
1016	Distance	Std Err Mean	11.9268
1016	Distance	N	16
1016	Distance	p value	0.6799
2811	# Active Bouts	Mean	18.8077
2811	# Active Bouts	Std Err Mean	1.41097
2811	# Active Bouts	N	26
2811	# Active Bouts	p value	0.6949
2811	Avg. Active Bout Length	Mean	16.5106
2811	Avg. Active Bout Length	Std Err Mean	1.16556
2811	Avg. Active Bout Length	N	26
2811	Avg. Active Bout Length	p value	<0.0001
2811	Speed	Mean	0.471715
2811	Speed	Std Err Mean	0.00910111
2811	Speed	N	26
2811	Speed	p value	1
2811	Accel	Mean	0.105926
2811	Accel	Std Err Mean	0.00255814
2811	Accel	N	26
2811	Accel	p value	0.9995
2811	Distance	Mean	160.034
2811	Distance	Std Err Mean	9.21672
2811	Distance	N	26
2811	Distance	p value	1
13b	# Active Bouts	Mean	15.8571
13b	# Active Bouts	Std Err Mean	1.43806
13b	# Active Bouts	N	28
13b	# Active Bouts	p value	1
13b	Avg. Active Bout Length	Mean	24.2112
13b	Avg. Active Bout Length	Std Err Mean	2.08248
13b	Avg. Active Bout Length	N	28
13b	Avg. Active Bout Length	p value	1
13b	Speed	Mean	0.441007
13b	Speed	Std Err Mean	0.0136494
13b	Speed	N	28
13b	Speed	p value	<0.0001
13b	Accel	Mean	0.0805148
13b	Accel	Std Err Mean	0.00371008
13b	Accel	N	28
13b	Accel	p value	<0.0001
13b	Distance	Mean	160.58
13b	Distance	Std Err Mean	9.24477
13b	Distance	N	28
13b	Distance	p value	0.0004
2c	# Active Bouts	Mean	14.0606
2c	# Active Bouts	Std Err Mean	1.17013
2c	# Active Bouts	N	33
2c	# Active Bouts	p value	0.9919
2c	Avg. Active Bout Length	Mean	27.2317
2c	Avg. Active Bout Length	Std Err Mean	2.67131
2c	Avg. Active Bout Length	N	33
2c	Avg. Active Bout Length	p value	0.4329
2c	Speed	Mean	0.45423
2c	Speed	Std Err Mean	0.014606
2c	Speed	N	33
2c	Speed	p value	0.0004
2c	Accel	Mean	0.0839864
2c	Accel	Std Err Mean	0.00390814
2c	Accel	N	33
2c	Accel	p value	1
2c	Distance	Mean	151.322
2c	Distance	Std Err Mean	6.58594
2c	Distance	N	33
2c	Distance	p value	<0.0001
31a	# Active Bouts	Mean	11.381
31a	# Active Bouts	Std Err Mean	1.13279
31a	# Active Bouts	N	21
31a	# Active Bouts	p value	0.0705
31a	Avg. Active Bout Length	Mean	34.2805
31a	Avg. Active Bout Length	Std Err Mean	2.81593
31a	Avg. Active Bout Length	N	21
31a	Avg. Active Bout Length	p value	0.1572
31a	Speed	Mean	0.507385
31a	Speed	Std Err Mean	0.0120681
31a	Speed	N	21
31a	Speed	p value	<0.0001
31a	Accel	Mean	0.0754758
31a	Accel	Std Err Mean	0.00455255
31a	Accel	N	21
31a	Accel	p value	1
31a	Distance	Mean	192.068
31a	Distance	Std Err Mean	9.04998
31a	Distance	N	21
31a	Distance	p value	0.0048
92b	# Active Bouts	Mean	11.0556
92b	# Active Bouts	Std Err Mean	1.2718
92b	# Active Bouts	N	18
92b	# Active Bouts	p value	0.002
92b	Avg. Active Bout Length	Mean	31.0343
92b	Avg. Active Bout Length	Std Err Mean	4.15734
92b	Avg. Active Bout Length	N	18
92b	Avg. Active Bout Length	p value	<0.0001
92b	Speed	Mean	0.487963
92b	Speed	Std Err Mean	0.0196321
92b	Speed	N	18
92b	Speed	p value	<0.0001
92b	Accel	Mean	0.0899267
92b	Accel	Std Err Mean	0.00357285
92b	Accel	N	18
92b	Accel	p value	1
92b	Distance	Mean	163.241
92b	Distance	Std Err Mean	10.8639
92b	Distance	N	18
92b	Distance	p value	<0.0001
9c	# Active Bouts	Mean	7.14815
9c	# Active Bouts	Std Err Mean	0.765539
9c	# Active Bouts	N	27
9c	# Active Bouts	p value	0.007
9c	Avg. Active Bout Length	Mean	47.7239
9c	Avg. Active Bout Length	Std Err Mean	6.21662
9c	Avg. Active Bout Length	N	27
9c	Avg. Active Bout Length	p value	0.0173
9c	Speed	Mean	0.404735
9c	Speed	Std Err Mean	0.017895
9c	Speed	N	27
9c	Speed	p value	<0.0001
9c	Accel	Mean	0.060223
9c	Accel	Std Err Mean	0.00233109
9c	Accel	N	27
9c	Accel	p value	0.9659
9c	Distance	Mean	139.745
9c	Distance	Std Err Mean	8.21361
9c	Distance	N	27
9c	Distance	p value	0.0048
iab 43p	# Active Bouts	Mean	16.8
iab 43p	# Active Bouts	Std Err Mean	1.37764
iab 43p	# Active Bouts	N	20
iab 43p	# Active Bouts	p value	<0.0001
iab 43p	Avg. Active Bout Length	Mean	18.7924
iab 43p	Avg. Active Bout Length	Std Err Mean	1.80651
iab 43p	Avg. Active Bout Length	N	20
iab 43p	Avg. Active Bout Length	p value	<0.0001
iab 43p	Speed	Mean	0.259445
iab 43p	Speed	Std Err Mean	0.015948
iab 43p	Speed	N	20
iab 43p	Speed	p value	0.7266
iab 43p	Accel	Mean	0.05963
iab 43p	Accel	Std Err Mean	0.00312072
iab 43p	Accel	N	20
iab 43p	Accel	p value	0.0076
iab 43p	Distance	Mean	88.9544
iab 43p	Distance	Std Err Mean	6.42092
iab 43p	Distance	N	20
iab 43p	Distance	p value	0.8609
let7	# Active Bouts	Mean	10.1875
let7	# Active Bouts	Std Err Mean	1.21181
let7	# Active Bouts	N	16
let7	# Active Bouts	p value	1
let7	Avg. Active Bout Length	Mean	33.0247
let7	Avg. Active Bout Length	Std Err Mean	4.18907
let7	Avg. Active Bout Length	N	16
let7	Avg. Active Bout Length	p value	1
let7	Speed	Mean	0.362423
let7	Speed	Std Err Mean	0.0209914
let7	Speed	N	16
let7	Speed	p value	0.0466
let7	Accel	Mean	0.0662874
let7	Accel	Std Err Mean	0.00253207
let7	Accel	N	16
let7	Accel	p value	0.0517
let7	Distance	Mean	127.473
let7	Distance	Std Err Mean	10.4836
let7	Distance	N	16
let7	Distance	p value	0.993
Scramble	# Active Bouts	Mean	19.7471
Scramble	# Active Bouts	Std Err Mean	0.441264
Scramble	# Active Bouts	N	261
Scramble	# Active Bouts	p value	N/A
Scramble	Avg. Active Bout Length	Mean	15.4896
Scramble	Avg. Active Bout Length	Std Err Mean	0.452028
Scramble	Avg. Active Bout Length	N	N/A
Scramble	Avg. Active Bout Length	p value	0.0024
Scramble	Speed	Mean	0.347765
Scramble	Speed	Std Err Mean	0.00570788
Scramble	Speed	N	N/A
Scramble	Speed	p value	1
Scramble	Accel	Mean	0.0775216
Scramble	Accel	Std Err Mean	0.00113992
Scramble	Accel	N	N/A
Scramble	Accel	p value	0.9989
Scramble	Distance	Mean	114.374
Scramble	Distance	Std Err Mean	2.35912
Scramble	Distance	N	261
Scramble	Distance	p value	N/A

## Sheet: Larval Null
DATA FILTERS
Mir Line	% Difference Parameter	Stat	Value
d14	%Speed	Mean	-27.0854
d14	%Speed	Std Err Mean	6.79668
d14	%Speed	N	33
d14	%Speed	P value	<0.0001
d14	%Accel	Mean	-29.9143
d14	%Accel	Std Err Mean	2.56462
d14	%Accel	N	33
d14	%Accel	P value	<0.0001
d14	%Distance	Mean	-45.6808
d14	%Distance	Std Err Mean	3.58354
d14	%Distance	N	33
d14	%Distance	P value	<0.0001
d14	%# Active Bout	Mean	-29.3249
d14	%# Active Bout	Std Err Mean	9.57985
d14	%# Active Bout	N	33
d14	%# Active Bout	P value	0.0742
d14	%Avg. Active Bout Length	Mean	60.6651
d14	%Avg. Active Bout Length	Std Err Mean	24.1504
d14	%Avg. Active Bout Length	N	33
d14	%Avg. Active Bout Length	P value	0.218
190	%Speed	Mean	-29.9782
190	%Speed	Std Err Mean	2.24699
190	%Speed	N	29
190	%Speed	P value	<0.0001
190	%Accel	Mean	-23.6624
190	%Accel	Std Err Mean	1.50147
190	%Accel	N	29
190	%Accel	P value	<0.0001
190	%Distance	Mean	-23.8402
190	%Distance	Std Err Mean	5.25248
190	%Distance	N	29
190	%Distance	P value	0.0791
190	%# Active Bout	Mean	-13.3566
190	%# Active Bout	Std Err Mean	7.00683
190	%# Active Bout	N	29
190	%# Active Bout	P value	0.8969
190	%Avg. Active Bout Length	Mean	28.8869
190	%Avg. Active Bout Length	Std Err Mean	13.1441
190	%Avg. Active Bout Length	N	29
190	%Avg. Active Bout Length	P value	0.9577
d2c-13a,b	%Speed	Mean	-32.2465
d2c-13a,b	%Speed	Std Err Mean	2.6111
d2c-13a,b	%Speed	N	38
d2c-13a,b	%Speed	P value	<0.0001
d2c-13a,b	%Accel	Mean	-6.55515
d2c-13a,b	%Accel	Std Err Mean	2.39021
d2c-13a,b	%Accel	N	38
d2c-13a,b	%Accel	P value	0.7917
d2c-13a,b	%Distance	Mean	-28.0321
d2c-13a,b	%Distance	Std Err Mean	3.51608
d2c-13a,b	%Distance	N	38
d2c-13a,b	%Distance	P value	0.0112
d2c-13a,b	%# Active Bout	Mean	-6.72885
d2c-13a,b	%# Active Bout	Std Err Mean	7.49815
d2c-13a,b	%# Active Bout	N	38
d2c-13a,b	%# Active Bout	P value	0.9992
d2c-13a,b	%Avg. Active Bout Length	Mean	18.5236
d2c-13a,b	%Avg. Active Bout Length	Std Err Mean	9.64513
d2c-13a,b	%Avg. Active Bout Length	N	38
d2c-13a,b	%Avg. Active Bout Length	P value	0.9979
d308	%Speed	Mean	-26.649
d308	%Speed	Std Err Mean	2.31079
d308	%Speed	N	24
d308	%Speed	P value	0.0001
d308	%Accel	Mean	-29.8553
d308	%Accel	Std Err Mean	1.56563
d308	%Accel	N	24
d308	%Accel	P value	<0.0001
d308	%Distance	Mean	-11.9972
d308	%Distance	Std Err Mean	4.78185
d308	%Distance	N	24
d308	%Distance	P value	0.8495
d308	%# Active Bout	Mean	-31.8302
d308	%# Active Bout	Std Err Mean	9.12332
d308	%# Active Bout	N	24
d308	%# Active Bout	P value	0.0743
d308	%Avg. Active Bout Length	Mean	140.99
d308	%Avg. Active Bout Length	Std Err Mean	34.6371
d308	%Avg. Active Bout Length	N	24
d308	%Avg. Active Bout Length	P value	<0.0001
d310-313	%Speed	Mean	-15.1927
d310-313	%Speed	Std Err Mean	3.46211
d310-313	%Speed	N	21
d310-313	%Speed	P value	0.1247
d310-313	%Accel	Mean	-20.7182
d310-313	%Accel	Std Err Mean	2.89178
d310-313	%Accel	N	21
d310-313	%Accel	P value	0.0032
d310-313	%Distance	Mean	-23.661
d310-313	%Distance	Std Err Mean	8.21955
d310-313	%Distance	N	21
d310-313	%Distance	P value	0.1425
d310-313	%# Active Bout	Mean	-28.7221
d310-313	%# Active Bout	Std Err Mean	9.69158
d310-313	%# Active Bout	N	21
d310-313	%# Active Bout	P value	0.1722
d310-313	%Avg. Active Bout Length	Mean	45.407
d310-313	%Avg. Active Bout Length	Std Err Mean	21.2574
d310-313	%Avg. Active Bout Length	N	21
d310-313	%Avg. Active Bout Length	P value	0.7132
d314	%Speed	Mean	-36.2062
d314	%Speed	Std Err Mean	1.93645
d314	%Speed	N	19
d314	%Speed	P value	<0.0001
d314	%Accel	Mean	-23.9396
d314	%Accel	Std Err Mean	2.2024
d314	%Accel	N	19
d314	%Accel	P value	0.0006
d314	%Distance	Mean	-19.4691
d314	%Distance	Std Err Mean	2.94152
d314	%Distance	N	19
d314	%Distance	P value	0.3778
d314	%# Active Bout	Mean	52.8981
d314	%# Active Bout	Std Err Mean	10.19
d314	%# Active Bout	N	19
d314	%# Active Bout	P value	0.0005
d314	%Avg. Active Bout Length	Mean	-21.423
d314	%Avg. Active Bout Length	Std Err Mean	10.0189
d314	%Avg. Active Bout Length	N	19
d314	%Avg. Active Bout Length	P value	0.9985
d92a	%Speed	Mean	-33.3165
d92a	%Speed	Std Err Mean	1.64539
d92a	%Speed	N	23
d92a	%Speed	P value	<0.0001
d92a	%Accel	Mean	-22.8845
d92a	%Accel	Std Err Mean	1.81937
d92a	%Accel	N	23
d92a	%Accel	P value	0.0005
d92a	%Distance	Mean	-24.5733
d92a	%Distance	Std Err Mean	4.87562
d92a	%Distance	N	23
d92a	%Distance	P value	0.0976
d92a	%# Active Bout	Mean	-35.4706
d92a	%# Active Bout	Std Err Mean	9.19232
d92a	%# Active Bout	N	23
d92a	%# Active Bout	P value	0.0355
d92a	%Avg. Active Bout Length	Mean	117.294
d92a	%Avg. Active Bout Length	Std Err Mean	23.8349
d92a	%Avg. Active Bout Length	N	23
d92a	%Avg. Active Bout Length	P value	0.0015
d92b	%Speed	Mean	-13.8871
d92b	%Speed	Std Err Mean	3.64274
d92b	%Speed	N	38
d92b	%Speed	P value	0.0844
d92b	%Accel	Mean	-6.79853
d92b	%Accel	Std Err Mean	2.52772
d92b	%Accel	N	38
d92b	%Accel	P value	0.7565
d92b	%Distance	Mean	-12.3399
d92b	%Distance	Std Err Mean	5.6054
d92b	%Distance	N	38
d92b	%Distance	P value	0.7174
d92b	%# Active Bout	Mean	-2.56496
d92b	%# Active Bout	Std Err Mean	6.99941
d92b	%# Active Bout	N	38
d92b	%# Active Bout	P value	1
d92b	%Avg. Active Bout Length	Mean	2.80892
d92b	%Avg. Active Bout Length	Std Err Mean	9.2681
d92b	%Avg. Active Bout Length	N	38
d92b	%Avg. Active Bout Length	P value	1
d966	%Speed	Mean	45.7557
d966	%Speed	Std Err Mean	7.03338
d966	%Speed	N	14
d966	%Speed	P value	<0.0001
d966	%Accel	Mean	32.6842
d966	%Accel	Std Err Mean	11.9031
d966	%Accel	N	14
d966	%Accel	P value	<0.0001
d966	%Distance	Mean	32.5841
d966	%Distance	Std Err Mean	14.9285
d966	%Distance	N	14
d966	%Distance	P value	0.0388
d966	%# Active Bout	Mean	-41.6817
d966	%# Active Bout	Std Err Mean	13.7729
d966	%# Active Bout	N	14
d966	%# Active Bout	P value	0.0337
d966	%Avg. Active Bout Length	Mean	154.023
d966	%Avg. Active Bout Length	Std Err Mean	47.5692
d966	%Avg. Active Bout Length	N	14
d966	%Avg. Active Bout Length	P value	0.0002
d999	%Speed	Mean	60.1432
d999	%Speed	Std Err Mean	4.86186
d999	%Speed	N	38
d999	%Speed	P value	<0.0001
d999	%Accel	Mean	54.6516
d999	%Accel	Std Err Mean	6.21439
d999	%Accel	N	38
d999	%Accel	P value	<0.0001
d999	%Distance	Mean	43.3626
d999	%Distance	Std Err Mean	9.9315
d999	%Distance	N	38
d999	%Distance	P value	<0.0001
d999	%# Active Bout	Mean	-49.3671
d999	%# Active Bout	Std Err Mean	5.46295
d999	%# Active Bout	N	38
d999	%# Active Bout	P value	<0.0001
d999	%Avg. Active Bout Length	Mean	106.502
d999	%Avg. Active Bout Length	Std Err Mean	18.0882
d999	%Avg. Active Bout Length	N	38
d999	%Avg. Active Bout Length	P value	0.0009
dLet7C	%Speed	Mean	-29.9042
dLet7C	%Speed	Std Err Mean	4.19805
dLet7C	%Speed	N	14
dLet7C	%Speed	P value	0.0003
dLet7C	%Accel	Mean	-16.9848
dLet7C	%Accel	Std Err Mean	3.73581
dLet7C	%Accel	N	14
dLet7C	%Accel	P value	0.0779
dLet7C	%Distance	Mean	-28.0021
dLet7C	%Distance	Std Err Mean	8.46764
dLet7C	%Distance	N	14
dLet7C	%Distance	P value	0.1135
dLet7C	%# Active Bout	Mean	17.9928
dLet7C	%# Active Bout	Std Err Mean	12.5466
dLet7C	%# Active Bout	N	14
dLet7C	%# Active Bout	P value	0.8428
dLet7C	%Avg. Active Bout Length	Mean	-28.536
dLet7C	%Avg. Active Bout Length	Std Err Mean	5.86779
dLet7C	%Avg. Active Bout Length	N	14
dLet7C	%Avg. Active Bout Length	P value	0.9924
dmir-7	%Speed	Mean	-16.9635
dmir-7	%Speed	Std Err Mean	7.0486
dmir-7	%Speed	N	15
dmir-7	%Speed	P value	0.1214
dmir-7	%Accel	Mean	12.3588
dmir-7	%Accel	Std Err Mean	3.69615
dmir-7	%Accel	N	15
dmir-7	%Accel	P value	0.3424
dmir-7	%Distance	Mean	-57.0099
dmir-7	%Distance	Std Err Mean	4.00896
dmir-7	%Distance	N	15
dmir-7	%Distance	P value	<0.0001
dmir-7	%# Active Bout	Mean	-66.6667
dmir-7	%# Active Bout	Std Err Mean	6.38811
dmir-7	%# Active Bout	N	15
dmir-7	%# Active Bout	P value	<0.0001
dmir-7	%Avg. Active Bout Length	Mean	126.487
dmir-7	%Avg. Active Bout Length	Std Err Mean	59.8407
dmir-7	%Avg. Active Bout Length	N	15
dmir-7	%Avg. Active Bout Length	P value	0.0033
w1118	%Speed	Mean	1.576e-05
w1118	%Speed	Std Err Mean	2.61708
w1118	%Speed	N	30
w1118	%Speed	P value	N/A
w1118	%Accel	Mean	-2.477e-05
w1118	%Accel	Std Err Mean	3.07414
w1118	%Accel	N	30
w1118	%Accel	P value	N/A
w1118	%Distance	Mean	2.4558e-06
w1118	%Distance	Std Err Mean	6.89474
w1118	%Distance	N	30
w1118	%Distance	P value	N/A
w1118	%# Active Bout	Mean	-5.68e-15
w1118	%# Active Bout	Std Err Mean	8.01812
w1118	%# Active Bout	N	30
w1118	%# Active Bout	P value	N/A
w1118	%Avg. Active Bout Length	Mean	-6.089e-07
w1118	%Avg. Active Bout Length	Std Err Mean	7.96373
w1118	%Avg. Active Bout Length	N	30
w1118	%Avg. Active Bout Length	P value	N/A
